# Supplementary material for: TopEC: prediction of Enzyme Commission classes by 3D graph neural networks and localized 3D protein descriptor
Source: Springer Nature journal article supplement (doi:10.1038/s41467-025-57324-5), 2025-03-20
Supplement: MOESM1 [file 41467_2025_57324_MOESM1_ESM.pdf]

## Supporting Information

# **TopEC: Prediction of Enzyme Commission classes by 3D Graph Neural Networks and localized 3D protein descriptor**

Karel van der Weg<sup>1</sup>, Erinc Merdivan<sup>2</sup>, Marie Piraud<sup>2</sup>, Holger Gohlke<sup>1,3,\*</sup>

<sup>1</sup>Institute of Bio- and Geosciences (IBG-4: Bioinformatics), Forschungszentrum Jülich GmbH, 52425 Jülich, Germany

<sup>2</sup>Helmholtz AI Central Unit, Ingolstädter Landstraße 1, 85764 Oberschleißheim, Germany

<sup>3</sup>Institute for Pharmaceutical and Medicinal Chemistry, Heinrich Heine University Düsseldorf, 40225 Düsseldorf, Germany

\*Corresponding Author:

Prof. Dr. Holger Gohlke

Address: Wilhelm-Johnen-Str., 52425 Jülich, Germany.

Phone: (+49) 2461 61 85550

E-mail: [h.gohlke@fz-juelich.de](mailto:h.gohlke@fz-juelich.de)

## Contents

|                                                                                                                                                                                                                        |    |
|------------------------------------------------------------------------------------------------------------------------------------------------------------------------------------------------------------------------|----|
| Supplementary Tables .....                                                                                                                                                                                             | 4  |
| <b>Supplementary Table 1.</b> Details of the ProSPECCTs datasets. ....                                                                                                                                                 | 4  |
| <b>Supplementary Table 2.</b> The pair-wise sequence identity for structures in Fig. 4g.....                                                                                                                           | 4  |
| <b>Supplementary Table 3.</b> Atom annotation per residue type. ....                                                                                                                                                   | 5  |
| <b>Supplementary Table 4.</b> Training and inference speeds.....                                                                                                                                                       | 8  |
| Supplementary Figures .....                                                                                                                                                                                            | 9  |
| <b>Supplementary Figure 1.</b> Our implementation of the SchNet and DimeNet++ architecture... ..                                                                                                                       | 9  |
| <b>Supplementary Figure 2.</b> Model performance when training with and without oversampling.<br>.....                                                                                                                 | 10 |
| <b>Supplementary Figure 3.</b> EnzyNet results for all modes and datasets tested. ....                                                                                                                                 | 11 |
| <b>Supplementary Figure 4.</b> F1 score as a function of graph node count for hierarchical EC<br>classification. ....                                                                                                  | 12 |
| <b>Supplementary Figure 5.</b> Model performance when training on <i>ab initio</i> predicted structures<br>(AlphaFold2) or homology modeled structures (TopModel) for various descriptors and<br>networks tested. .... | 13 |
| <b>Supplementary Figure 6.</b> The area under the precision-recall curve against different<br>properties of the data.....                                                                                              | 14 |
| <b>Supplementary Figure 7.</b> 10 different folds for type II site-specific deoxyribonucleases.....                                                                                                                    | 15 |
| <b>Supplementary Figure 8.</b> F1 score for all Price and ProSPECCTs datasets broken down by<br>tested network type. ....                                                                                              | 16 |
| <b>Supplementary Figure 9.</b> Importance gain per binding site and catalytic residue compared to<br>regular residues.....                                                                                             | 17 |
| <b>Supplementary Figure 10.</b> Investigation into the importance of the catalytic sites for PDB<br>1QF6 .....                                                                                                         | 18 |
| <b>Supplementary Figure 11.</b> Investigation into the importance of the catalytic sites for PDB<br>3UH0.....                                                                                                          | 19 |
| <b>Supplementary Figure 12.</b> Investigation into the importance of the catalytic sites for PDB<br>3UGQ.....                                                                                                          | 20 |
| <b>Supplementary Figure 13.</b> Investigation into the importance of the catalytic sites for PDB<br>6VU9 .....                                                                                                         | 21 |
| <b>Supplementary Figure 14.</b> Investigation into the importance of the catalytic sites for PDB<br>5ZY9 .....                                                                                                         | 22 |
| <b>Supplementary Figure 15.</b> Explained PDB structure 1GLA compared to stability predictors.<br>.....                                                                                                                | 22 |
| <b>Supplementary Figure 16.</b> Explained PDB structure 1WQ1 compared to stability predictors<br>.....                                                                                                                 | 24 |
| <b>Supplementary Figure 17.</b> Explained PDB structure 3BLM compared to stability predictors.<br>.....                                                                                                                | 25 |

|                                                                                                                      |    |
|----------------------------------------------------------------------------------------------------------------------|----|
| <b>Supplementary Figure 18.</b> Explained PDB structure 2MAT compared to stability.....                              | 26 |
| <b>Supplementary Figure 19.</b> Explained PDB structure 1A9U compared to stability predictors.<br>.....              | 27 |
| <b>Supplementary Figure 20.</b> Explained PDB structure 3DRC compared to stability predictors.<br>.....              | 28 |
| <b>Supplementary Figure 21.</b> Explained PDB structure 1BIW compared to stability predictors.<br>.....              | 29 |
| <b>Supplementary Figure 22.</b> Importance for all catalytic and binding atoms. ....                                 | 34 |
| <b>Supplementary Figure 23.</b> Importance for all non-catalytic and non-binding atoms. ....                         | 39 |
| <b>Supplementary Figure 24.</b> Importance for all catalytic and binding atoms in wrongly<br>predicted enzymes. .... | 44 |

## Supplementary Tables

**Supplementary Table 1.** Details of the ProSPECCTs datasets.

| Name  | Description                                             | Goal                                                                                                                               |
|-------|---------------------------------------------------------|------------------------------------------------------------------------------------------------------------------------------------|
| DS1   | Structures with identical sequences                     | Sensitivity with respect to the binding site definition.                                                                           |
| DS1.2 | Structures with identical sequences and similar ligands | Impact of ligand diversity on binding site comparison                                                                              |
| DS2   | NMR structures                                          | Sensitivity with respect to the binding site flexibility                                                                           |
| DS3   | Decoy set 1                                             | Differentiation between binding sites with different physicochemical properties                                                    |
| DS4   | Decoy set 2                                             | Differentiation between binding sites with different physicochemical and shape properties                                          |
| DS5   | Kahraman data set without phosphate binding sites       | Classification of proteins binding to identical ligands and cofactors                                                              |
| DS5.2 | Kahraman data set                                       | Original data set                                                                                                                  |
| DS6   | Barelier data set                                       | Identification of distant relationships between protein binding sites with identical ligands which “observe” a similar environment |
| DS6.2 | Barelier data set including cofactors                   |                                                                                                                                    |
| DS7   | Data set of successful applications                     | Recovery of known binding site similarities within a set of diverse proteins.                                                      |

Adapted from: Ehrt C, Brinkjost T, Koch O (2018) A benchmark driven guide to binding site comparison: An exhaustive evaluation using tailor-made data sets (ProSPECCTs). PLoS Comput Biol 14(11): e1006483. <https://doi.org/10.1371/journal.pcbi.1006483>

**Supplementary Table 2.** The pair-wise sequence identity for structures in Figure 3g.

| PDB  | 1QF6 | 3UH0 | 3UGQ | 5ZY9 | 6VU9 |
|------|------|------|------|------|------|
| 1QF6 | 100% |      |      |      |      |
| 3UH0 | 38%  | 100% |      |      |      |
| 3UGQ | 38%  | 100% | 100% |      |      |
| 5ZY9 | 40%  | 43%  | 43%  | 100% |      |
| 6VU9 | 59%  | 37%  | 36%  | 40%  | 100% |



**Supplementary Table 3.** Atom annotation per residue type.

| Backbone Atoms                             |         |         |
|--------------------------------------------|---------|---------|
| *13 in GLY/PRO<br>**Not present in GLY/PRO | N       | 1       |
|                                            | C       | 2       |
|                                            | CA*     | 3 (13*) |
|                                            | O / OXT | 4       |
|                                            | H**     | 32      |
|                                            | HA**    | 33      |

| Neutral-Nonpolar R Groups |                                            |    |
|---------------------------|--------------------------------------------|----|
| Glycine <b>GLY</b>        | H                                          | 32 |
|                           | 1HA / 2HA                                  | 39 |
| Alanine <b>ALA</b>        | CB                                         | 8  |
|                           | 1HB / 2HB / 3HB                            | 36 |
| Valine <b>VAL</b>         | CB                                         | 7  |
|                           | CG1 / CG2                                  | 8  |
|                           | HB                                         | 34 |
|                           | 1HG1 / 2HG1 / 3HG1 /<br>1HG2 / 2HG2 / 3HG2 | 36 |
|                           |                                            |    |
| Isoleucine <b>ILE</b>     | CB                                         | 6  |
|                           | CG1                                        | 7  |
|                           | CG2 / CD1                                  | 8  |
|                           | HB                                         | 34 |
|                           | 1HD1 / 2HD1 / 3HD1 /<br>1HG2 / 2HG2 / 3HG2 | 36 |
|                           | 1HG1 / 2HG1                                | 35 |
|                           |                                            |    |
| Leucine <b>LEU</b>        | CB                                         | 7  |
|                           | CG                                         | 6  |
|                           | CD1 / CD2                                  | 8  |
|                           | HG                                         | 34 |
|                           | 1HB / 2HB                                  | 35 |
|                           | 1HD1 / 2HD1 / 3HD1 /<br>1HD2 / 2HD2 / 3HD2 | 36 |
|                           |                                            |    |
| Proline <b>PRO</b>        | CB / CG / CD                               | 14 |
|                           | 1HB / 2HB / 1HD / 2HD /<br>1HG / 2HG       | 35 |
| Methionine <b>MET</b>     | CB / CG                                    | 7  |
|                           | CE                                         | 8  |
|                           | SD                                         | 22 |
|                           | 1HB / 2HB / 1HG / 2HG                      | 35 |

|  |                                |    |
|--|--------------------------------|----|
|  | 1H / 2H / 3H / 1HE / 2HE / 3HE | 36 |
|--|--------------------------------|----|

| Neutral-Polar R Groups |                       |    |
|------------------------|-----------------------|----|
| Serine <b>SER</b>      | CB                    | 7  |
|                        | OG                    | 10 |
|                        | 1HB / 2 HB            | 35 |
|                        | HG                    | 38 |
| Threonine <b>THR</b>   | CB                    | 6  |
|                        | CG2                   | 8  |
|                        | OG1                   | 10 |
|                        | HB                    | 34 |
|                        | 1HG2 / 2HG2 / 3HG2    | 36 |
|                        | HG                    | 38 |
| Asparagine <b>ASN</b>  | CB                    | 7  |
|                        | CG                    | 5  |
|                        | ND2                   | 17 |
|                        | OD1                   | 12 |
|                        | 1HB / 2HB             | 35 |
|                        | 1HD2 / 2HD2           | 43 |
| Glutamine <b>GLN</b>   | CB / CG               | 7  |
|                        | CD                    | 5  |
|                        | NE2                   | 17 |
|                        | OE1                   | 12 |
|                        | 1HB / 2HB / 1HG / 2HG | 35 |
|                        | 1HE2 / 2HE2           | 43 |
| Cysteine <b>CYS</b>    | CB                    | 7  |
|                        | SG                    | 20 |
|                        | 1HB / 2HB             | 35 |
|                        | HG                    | 45 |

| Acidic R Groups          |           |    |
|--------------------------|-----------|----|
| Aspartic Acid <b>ASP</b> | CB        | 7  |
|                          | CG        | 5  |
|                          | OD1 / OD2 | 11 |
|                          | 1HB / 2HB | 35 |
| Glutamic Acid <b>GLU</b> | CB / CG   | 7  |
|                          | CD        | 5  |
|                          | OE1 / OE2 | 11 |

| <b>Basic R Groups</b> |                                                     |    |
|-----------------------|-----------------------------------------------------|----|
| Lysine <b>LYS</b>     | CB / CG / CD / CE                                   | 7  |
|                       | NZ                                                  | 26 |
|                       | 1 HB / 2HB / 1HD / 2 HD /<br>1 HE / 2HE / 1HG / 2HG | 35 |
|                       | 1HZ / 2HZ / 3HZ                                     | 47 |
| Arginine <b>ARG</b>   | CB / CG / CD                                        | 7  |
|                       | CZ                                                  | 5  |
|                       | NE                                                  | 15 |
|                       | NH1 / NH2                                           | 16 |
|                       | HE                                                  | 41 |
|                       | 1HB / 2HB / 1HD / 2HD /<br>1HG / 2HG                | 35 |
|                       | 1HH1 / 2HH1 / 1HH2 /<br>2HH2                        | 42 |

| <b>Aromatic R Groups</b> |                            |    |
|--------------------------|----------------------------|----|
| Histidine <b>HIS</b>     | CB                         | 7  |
|                          | CG                         | 28 |
|                          | CD                         | 27 |
|                          | CE1                        | 25 |
|                          | ND1                        | 15 |
|                          | NE2                        | 15 |
|                          | 1HB / 2HB                  | 35 |
|                          | HD1 / HE2                  | 41 |
|                          | HE1                        | 46 |
|                          | HD2                        | 48 |
|                          |                            |    |
| Phenylalanine <b>PHE</b> | CB                         | 7  |
|                          | CG                         | 21 |
|                          | CD1 / CD2 / CE1 / CE2 / CZ | 9  |
|                          | HD1 / HD2 / HE1 / HE2 / HZ | 37 |
|                          | 1HB / 2HB                  | 35 |
| Tryptophan <b>TRP</b>    | CB                         | 7  |
|                          | CG                         | 29 |
|                          | CD1 / CE3 / CZ3            | 9  |
|                          | CD2 / CE2                  | 24 |
|                          | CH2 / CZ2                  | 18 |
|                          | NE1                        | 15 |
|                          | 1HB / 2HB                  | 35 |
|                          | HD1 / HE3 / HZ3            | 37 |
|                          | HE1                        | 41 |

|                     |                       |    |
|---------------------|-----------------------|----|
|                     | HH2 / HZ2             | 44 |
| Tyrosine <b>TYR</b> | CB                    | 7  |
|                     | CG                    | 23 |
|                     | CD1 / CD2 / CE1 / CE2 | 9  |
|                     | CZ                    | 19 |
|                     | OH                    | 10 |
|                     | HD1 / HD2 / HE1 / HE2 | 37 |
|                     | HH                    | 38 |
|                     | 1HB / 2HB             | 35 |

**Supplementary Table 4. Training and inference speeds.**

| <b>Training performance on 4x A100 using DDP using 100 nodes per graph.</b>    |                                                 |                                              |
|--------------------------------------------------------------------------------|-------------------------------------------------|----------------------------------------------|
| Network:                                                                       | Batches per second:                             | Proteins per second:                         |
| SchNett                                                                        | 2.52 ± 0.209 (batch = 256)                      | 645                                          |
| DimeNett                                                                       | 4.30 ± 0.238 (batch = 32)                       | 137                                          |
| <b>Predictive performance on an Intel Core i7-10700 @ 2.90GHz over 7 runs.</b> |                                                 |                                              |
| Number of nodes:                                                               | Residue resolution<br>(seconds per 100 samples) | Atom resolution (seconds<br>per 100 samples) |
| 25                                                                             | 1.04 ± 0.017                                    | 1.43 ± 0.004                                 |
| 50                                                                             | 1.34 ± 0.009                                    | 2.05 ± 0.095                                 |
| 75                                                                             | 1.59 ± 0.011                                    | 2.88 ± 0.205                                 |
| 100                                                                            | 1.85 ± 0.033                                    | 3.86 ± 0.193                                 |
| 150                                                                            | 2.63 ± 0.114                                    | 5.85 ± 0.237                                 |
| 200                                                                            | 3.61 ± 0.391                                    | 8.19 ± 0.126                                 |

## Supplementary Figures

### SchNet:

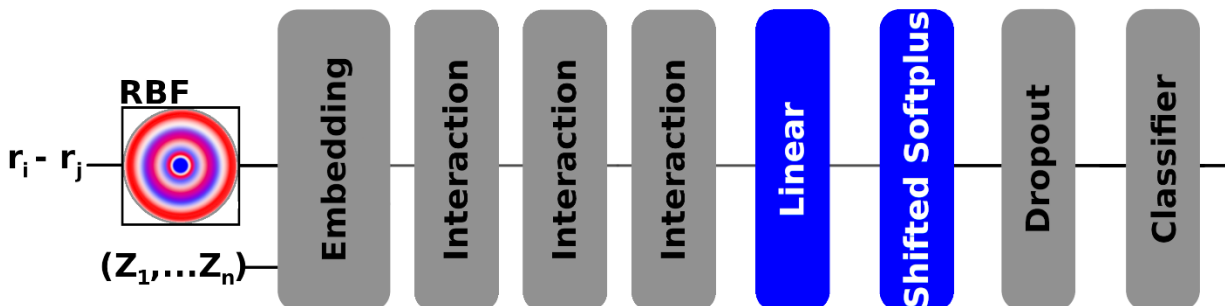

### DimeNet++:

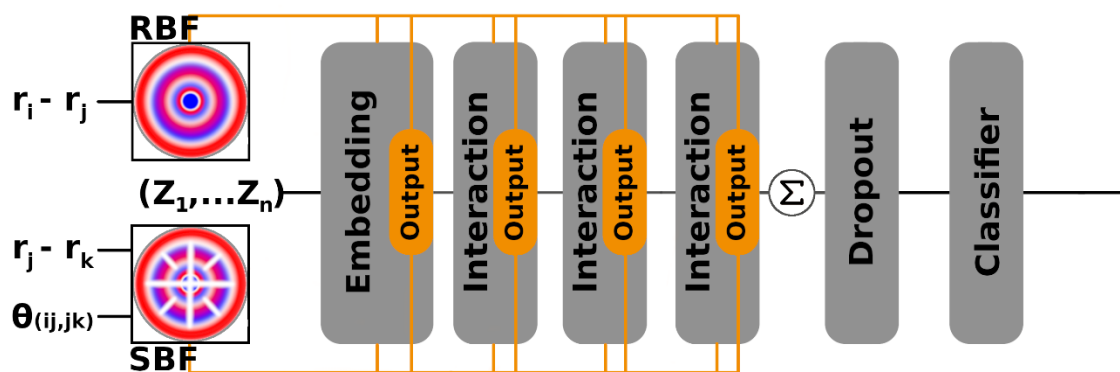

**Supplementary Figure 1.** Our implementation of the SchNet and DimeNet++ architecture.

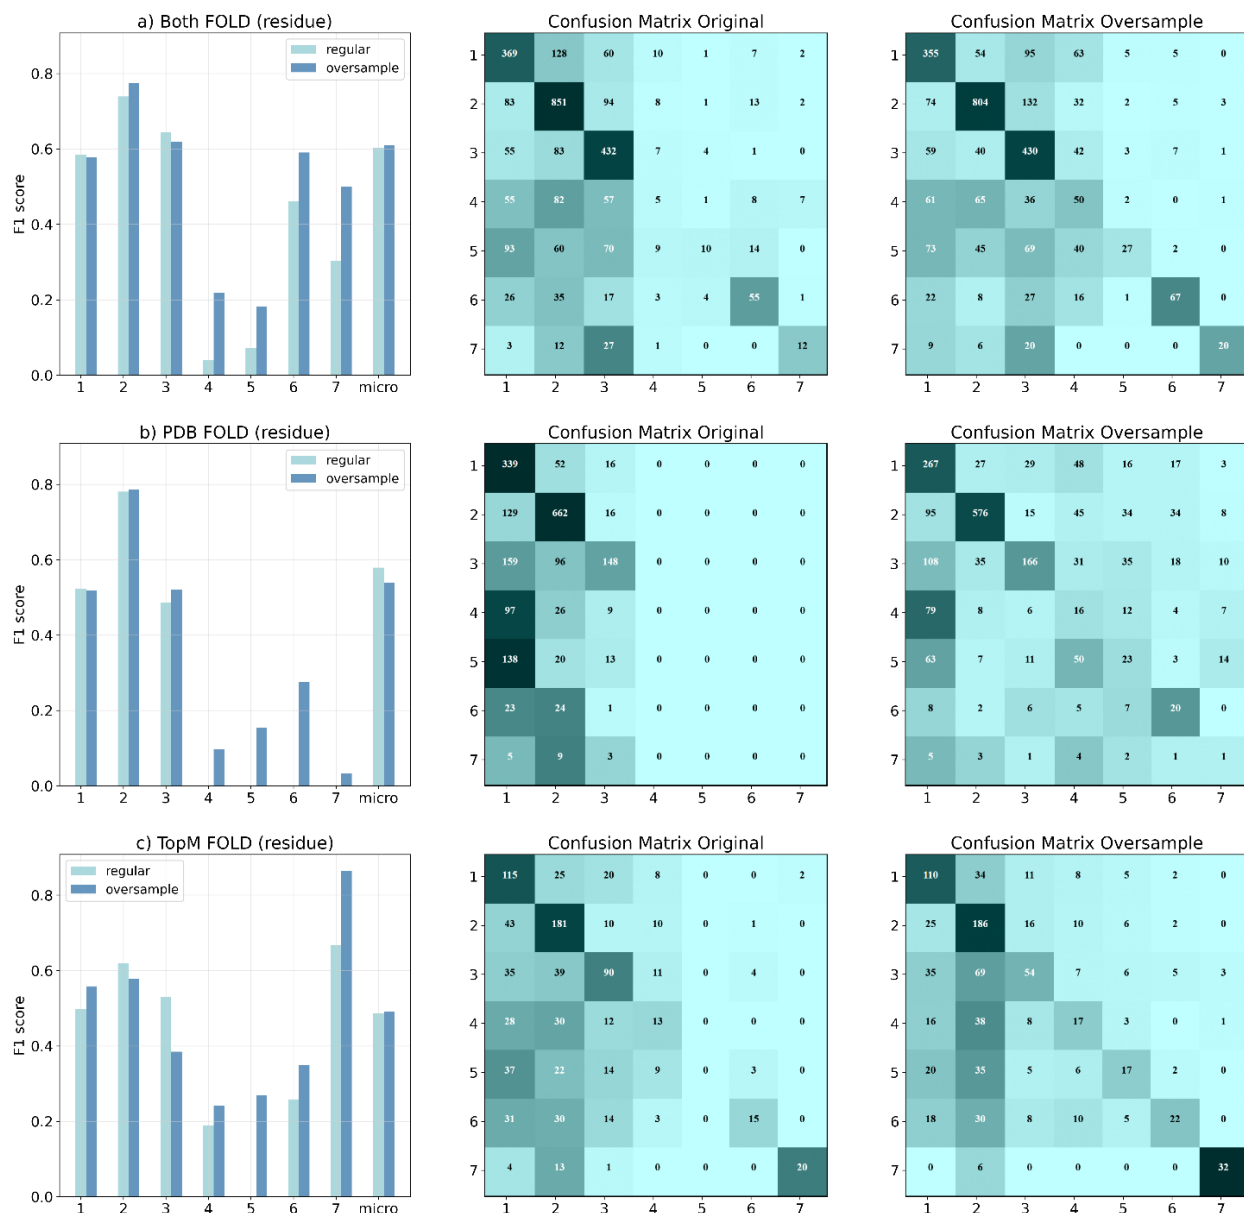

**Supplementary Figure 2.** Model performance when training with and without oversampling.

Left: The F-score for each mainclass of the fold networks tested in Table 1A. Middle: The confusion matrix for the networks tested without oversampling. Right: The confusion matrix for the networks tested with oversampling.

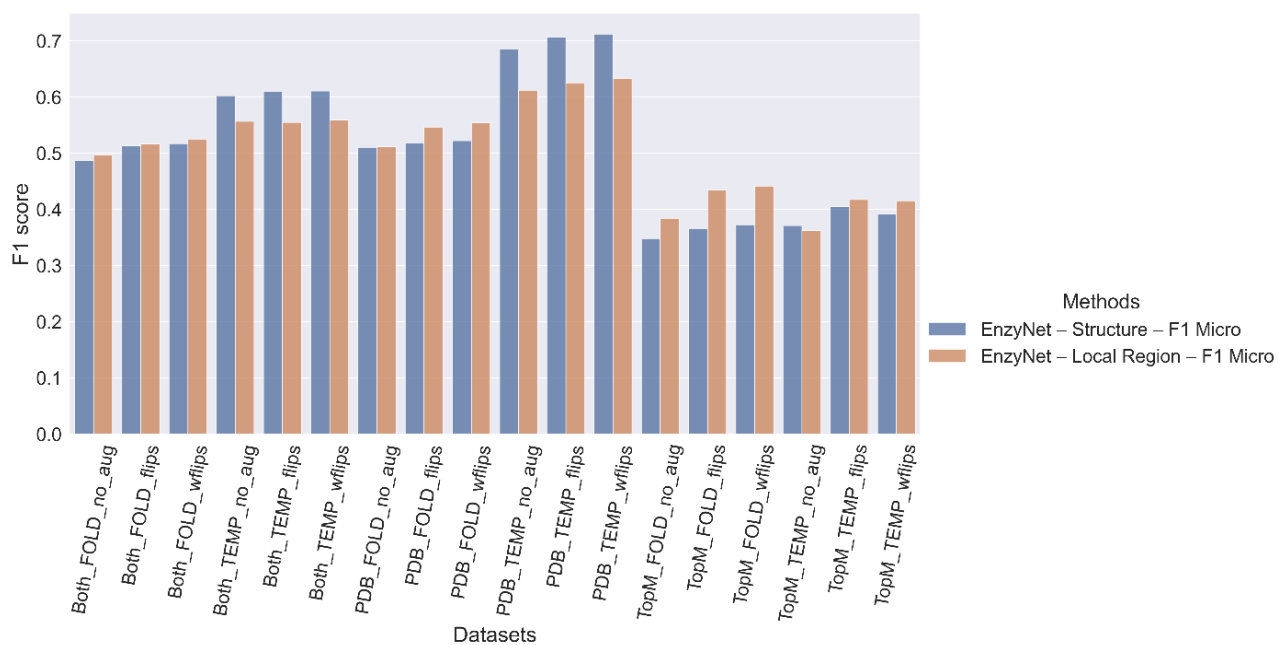

**Supplementary Figure 3.** EnzyNet results for all modes and datasets tested.

Each dataset and split for networks trained on the full structure and the local region (16 Å around the binding site). For each dataset and split combination, we tested three methods: no augmentation (*\_no\_aug*), flips (*\_flips*), and weighted flips (*\_wflips*).

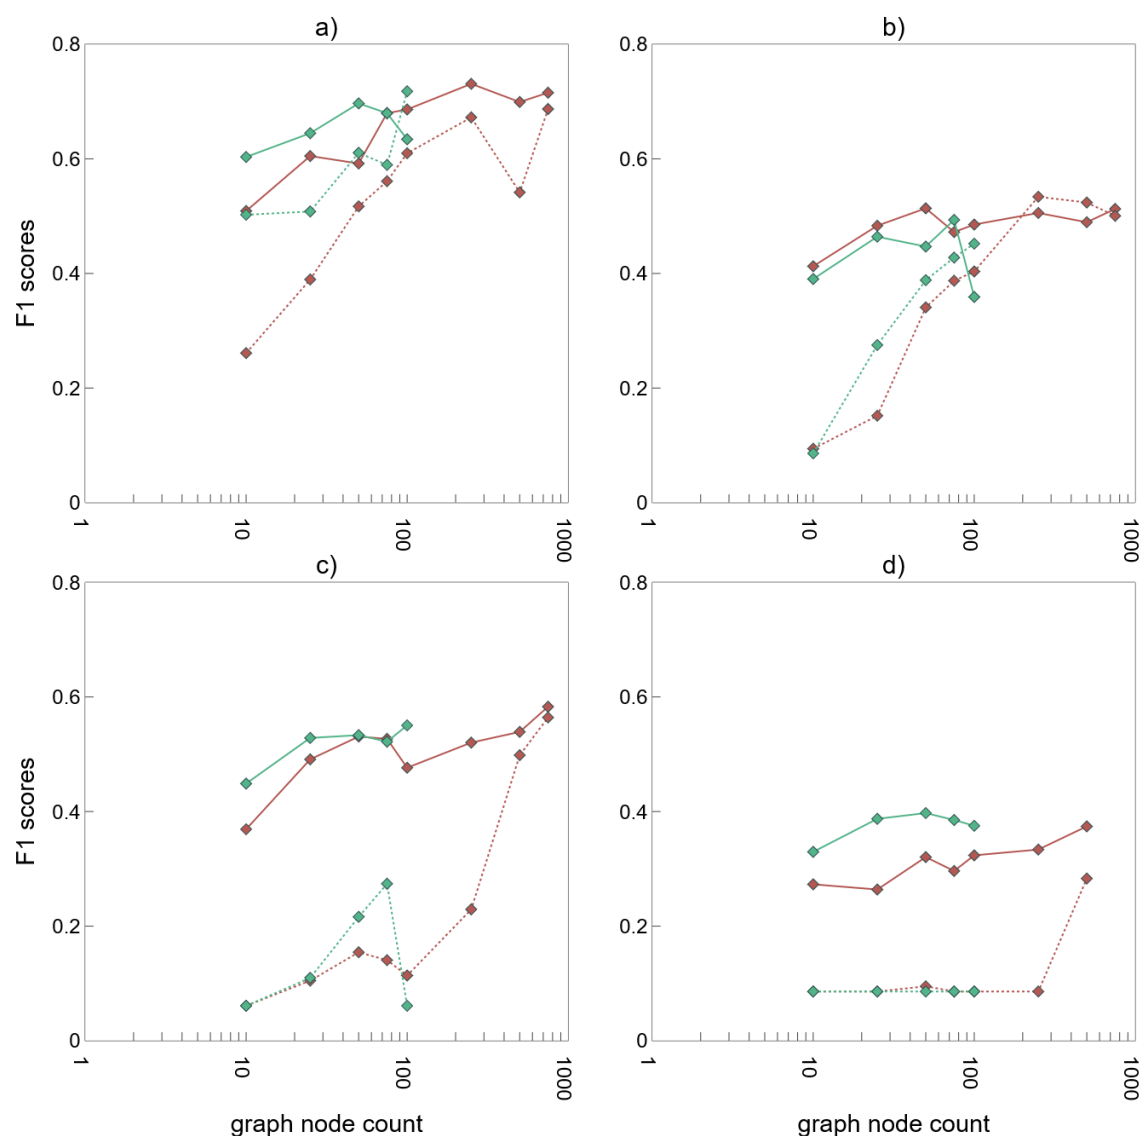

**Supplementary Figure 4.** F1 score as a function of graph node count for hierarchical EC classification.

Red: Networks trained with a SchNet model. Green: Networks trained with a DimeNet++ model. For the continuous lines, we created the localized 3D descriptors using binding site information. For the dotted lines, we created the localized 3D descriptor from a random point on the protein. We show the result for the combined dataset using a) residue resolution with a temporal split, b) residue resolution with a fold split, c) atom resolution with a temporal split, d) atom resolution with a fold split.



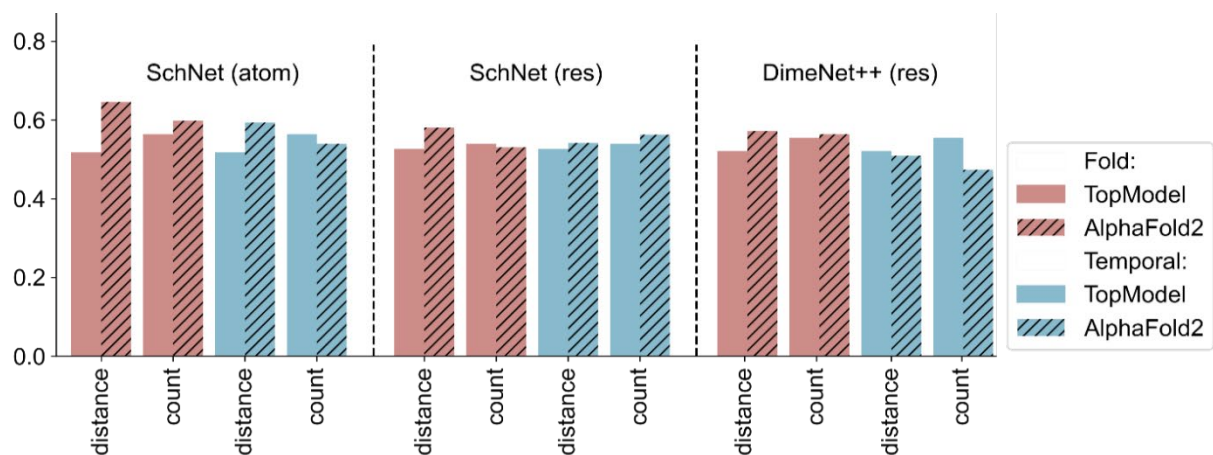

**Supplementary Figure 5.** Model performance when training on ab initio predicted structures (AlphaFold2) or homology modeled structures (TopModel) for various descriptors and networks tested.

F-score for the networks trained with models obtained from TopModel (no stripes) and AlphaFold2 (stripes) for a fold split (red) and a temporal split (blue).

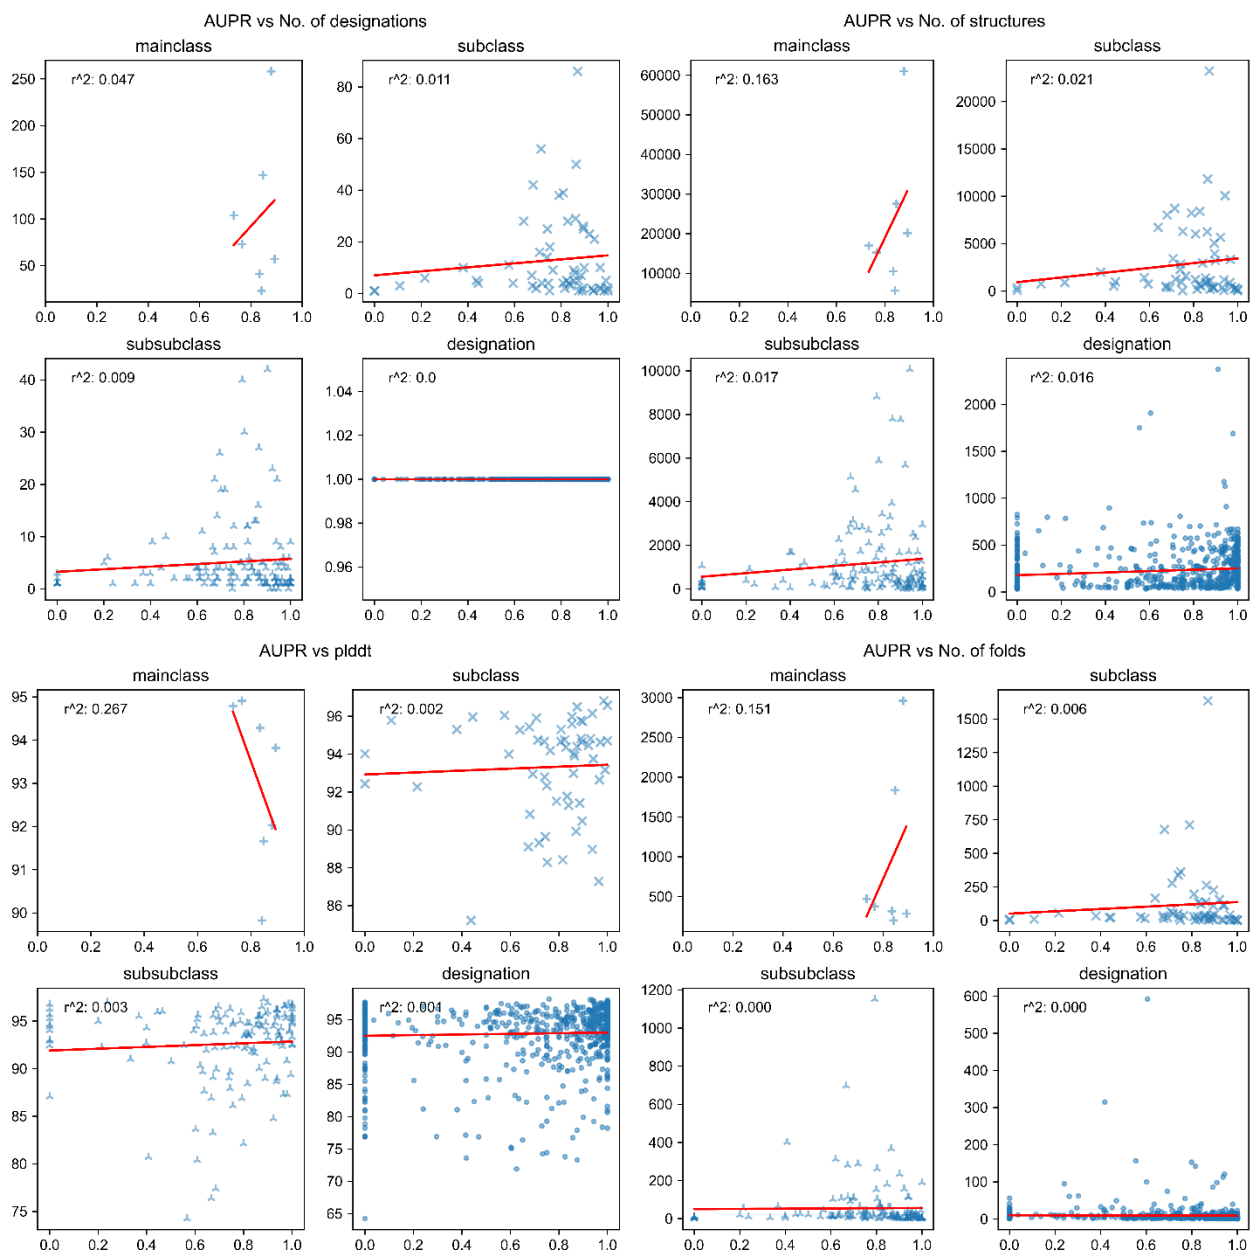

**Supplementary Figure 6.** The area under the precision-recall curve against different properties of the data.

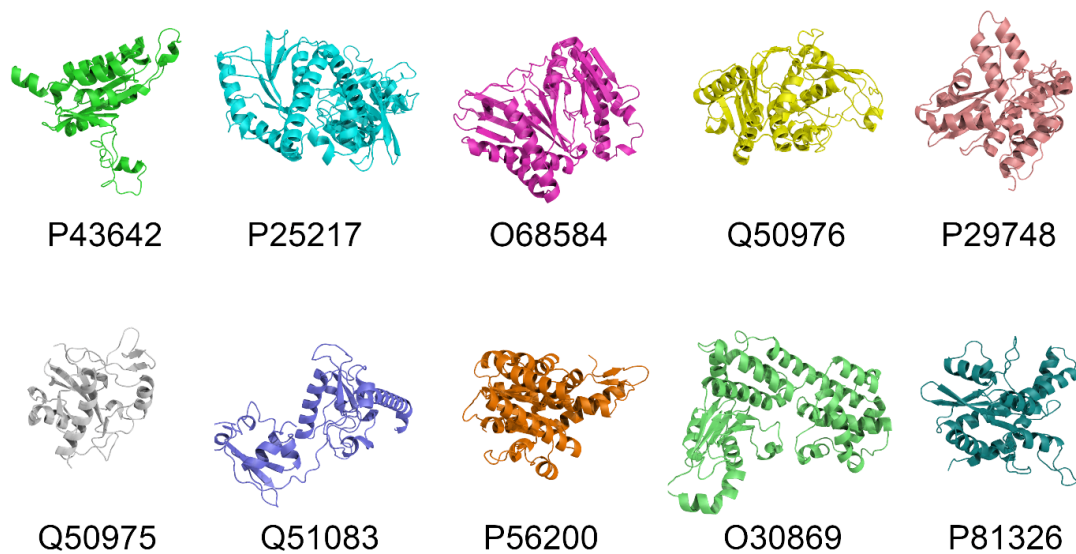

**Supplementary Figure 7.** 10 different folds for type II site-specific deoxyribonucleases. None of the structures are correctly predicted by a network trained on AF703 using a random split.

|                                 | Price | DS1  | DS1.2 | DS2  | DS3  | DS4  | DS5  | DS5.2 | DS6  | DS6.2 | DS7  |
|---------------------------------|-------|------|-------|------|------|------|------|-------|------|-------|------|
| fold_SchNet_atom_distance       | 0.24  | 0.12 | 0.44  | 0.48 | 0.37 | 0.36 | 0.48 | 0.49  | 0.69 | 0.69  | 0.55 |
| fold_SchNet_atom_count          | 0.10  | 0.04 | 0.11  | 0.20 | 0.33 | 0.34 | 0.40 | 0.46  | 0.38 | 0.38  | 0.35 |
| fold_SchNet_residue_distance    | 0.14  | 0.37 | 0.56  | 0.44 | 0.56 | 0.56 | 0.68 | 0.65  | 0.69 | 0.69  | 0.66 |
| fold_SchNet_residue_count       | 0.19  | 0.36 | 0.56  | 0.44 | 0.56 | 0.56 | 0.76 | 0.68  | 0.72 | 0.72  | 0.69 |
| fold_DimeNet++_atom_distance    | 0.19  | 0.22 | 0.22  | 0.43 | 0.36 | 0.36 | 0.44 | 0.43  | 0.59 | 0.59  | 0.53 |
| fold_DimeNet++_atom_count       | 0.10  | 0.09 | 0.11  | 0.19 | 0.35 | 0.33 | 0.20 | 0.24  | 0.34 | 0.34  | 0.35 |
| fold_DimeNet++_residue_distance | 0.10  | 0.38 | 0.56  | 0.53 | 0.22 | 0.30 | 0.48 | 0.51  | 0.55 | 0.55  | 0.64 |
| fold_DimeNet++_residue_count    | 0.19  | 0.36 | 0.56  | 0.78 | 0.50 | 0.50 | 0.72 | 0.59  | 0.62 | 0.62  | 0.64 |

**Supplementary Figure 8.** F1 score for all Price and ProSPECCTs datasets broken down by tested network type.

In the left column, the split, network, resolution, and localized 3D descriptor type for each subset of the Price and ProSPECCTs dataset are given.

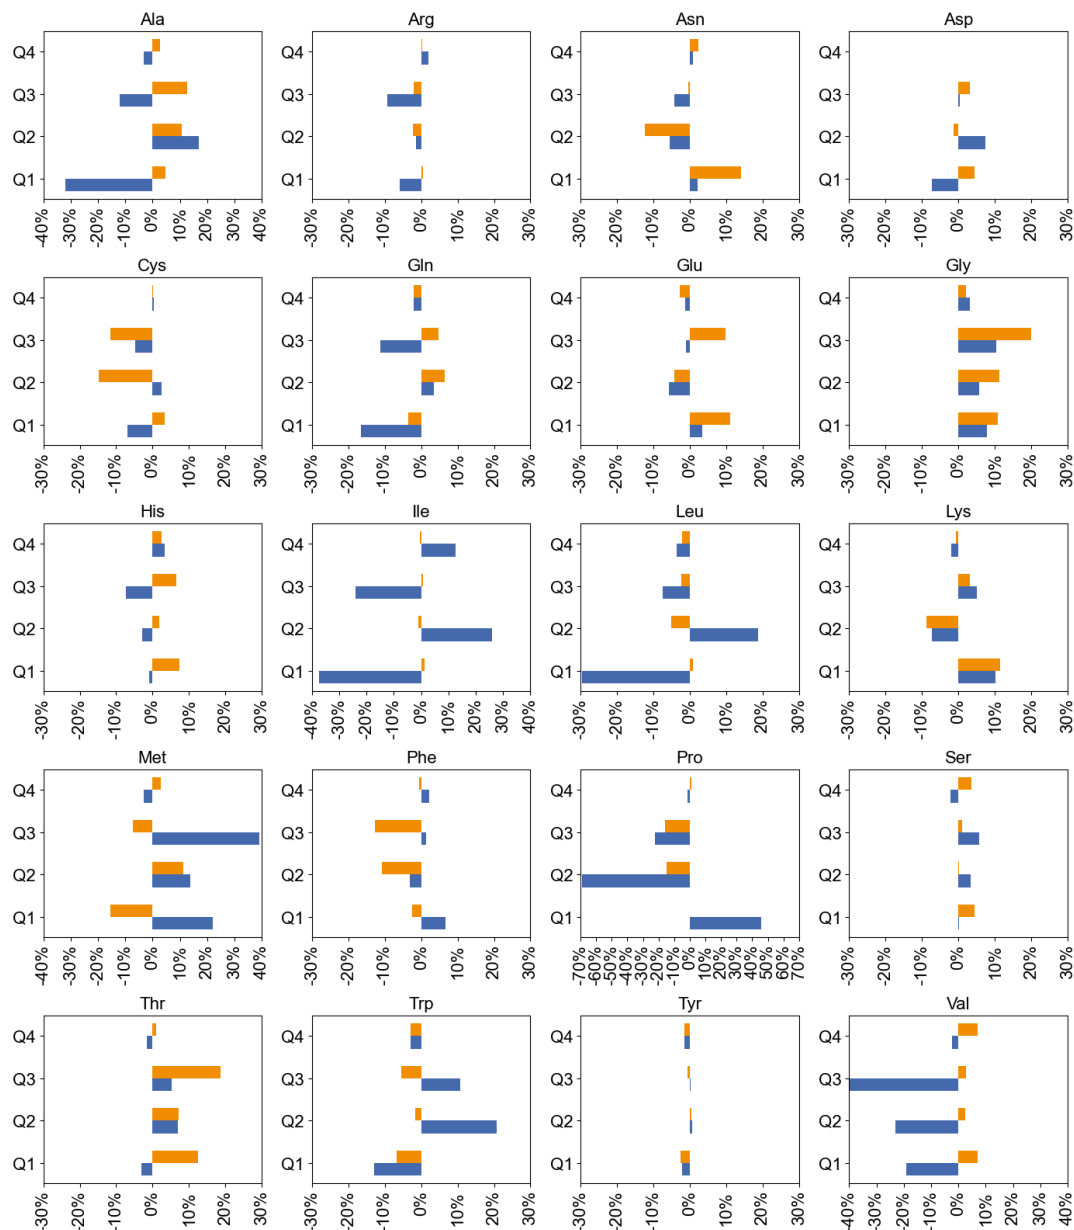

**Supplementary Figure 9.** Importance gain per binding site and catalytic residue compared to regular residues.

Each panel depicts a separate amino acid. We calculated the importance gain for catalytic (orange) and binding (blue) residues compared to all other residues of that type in the correctly predicted subset of the CSA. We have binned the importance values in four quartiles. A gain in Q1 and Q2 is characterized as positive if we find fewer binding or catalytic residues, while a gain in Q3 and Q4 is characterized as positive if we find more binding or catalytic residues.

PDB: 1QF6  
Confidence: 0.99

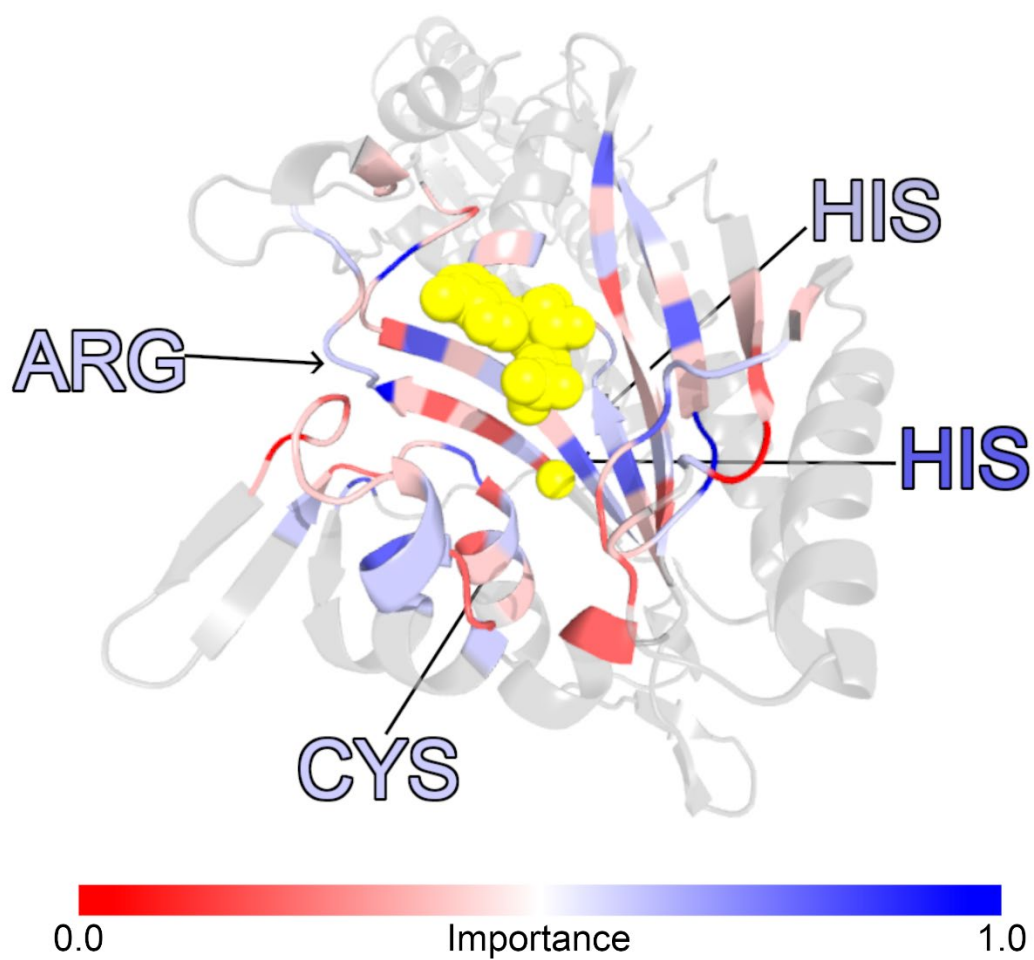

**Supplementary Figure 10.** Investigation into the importance of the catalytic sites for PDB 1QF6.

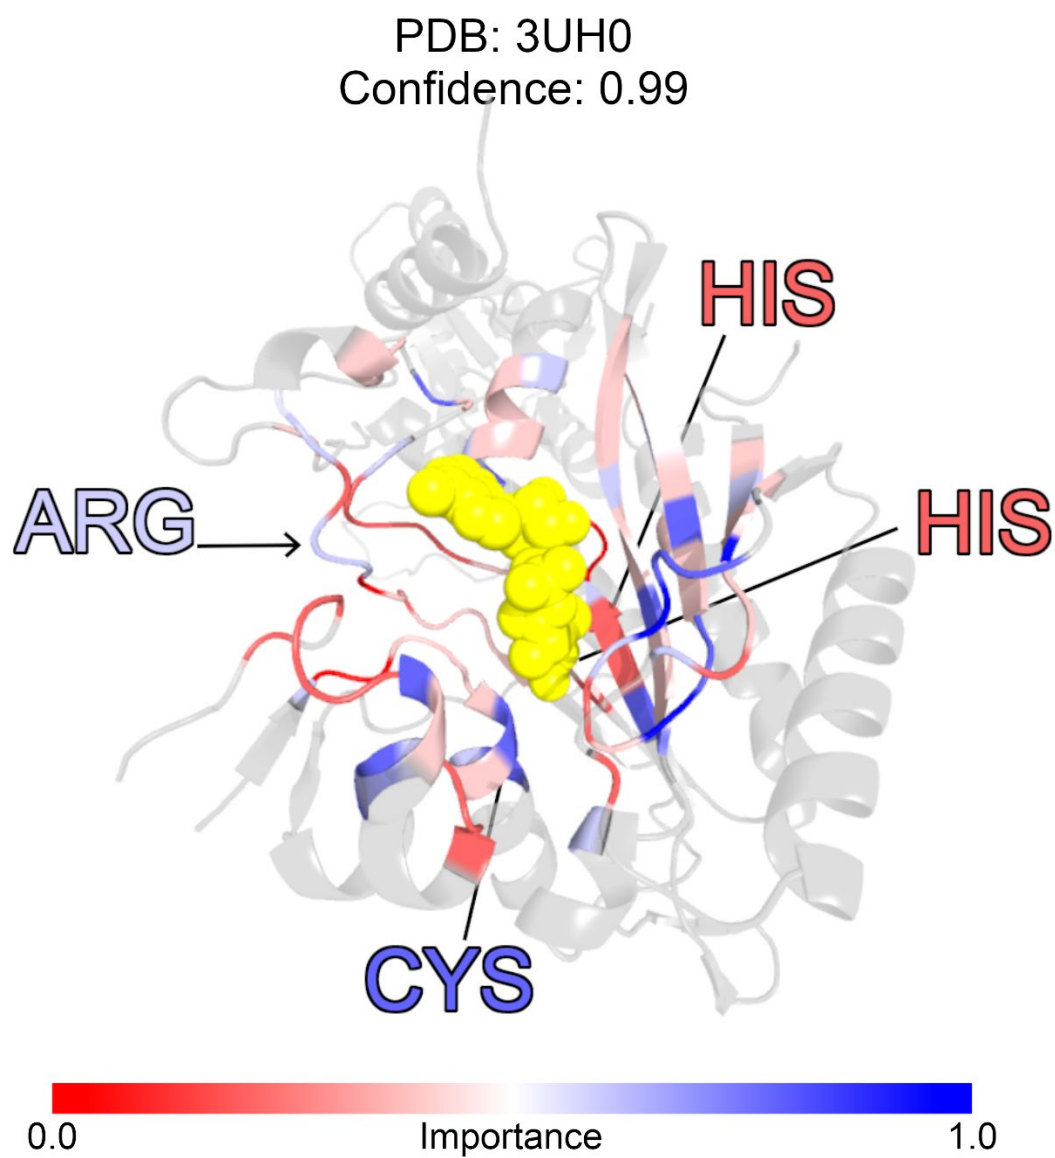

**Supplementary Figure 11.** Investigation into the importance of the catalytic sites for PDB 3UH0.

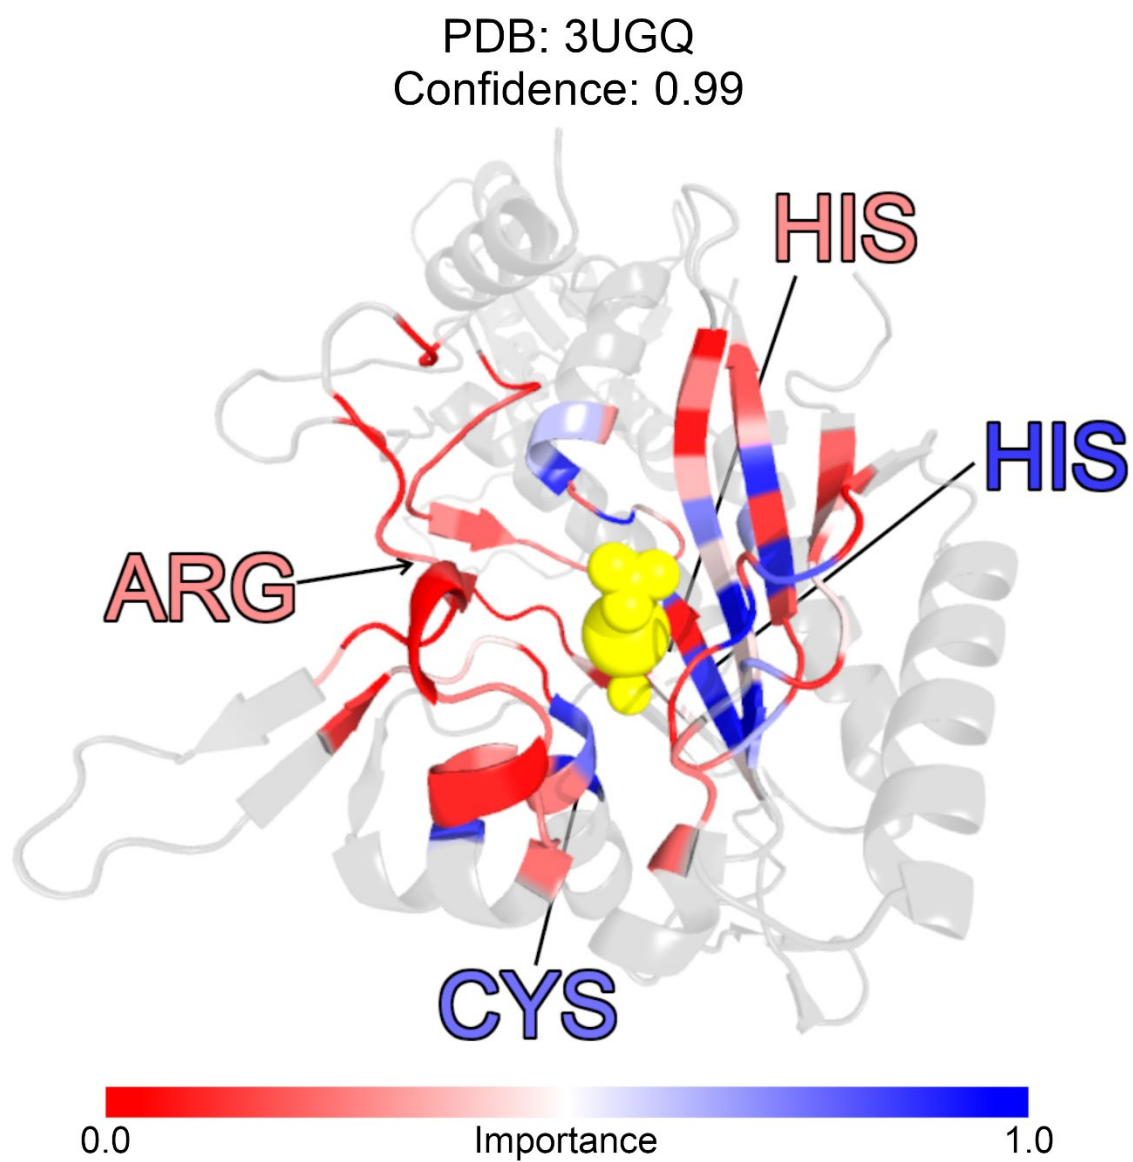

**Supplementary Figure 12.** Investigation into the importance of the catalytic sites for PDB 3UGQ.



PDB: 6VU9  
Confidence: 0.99

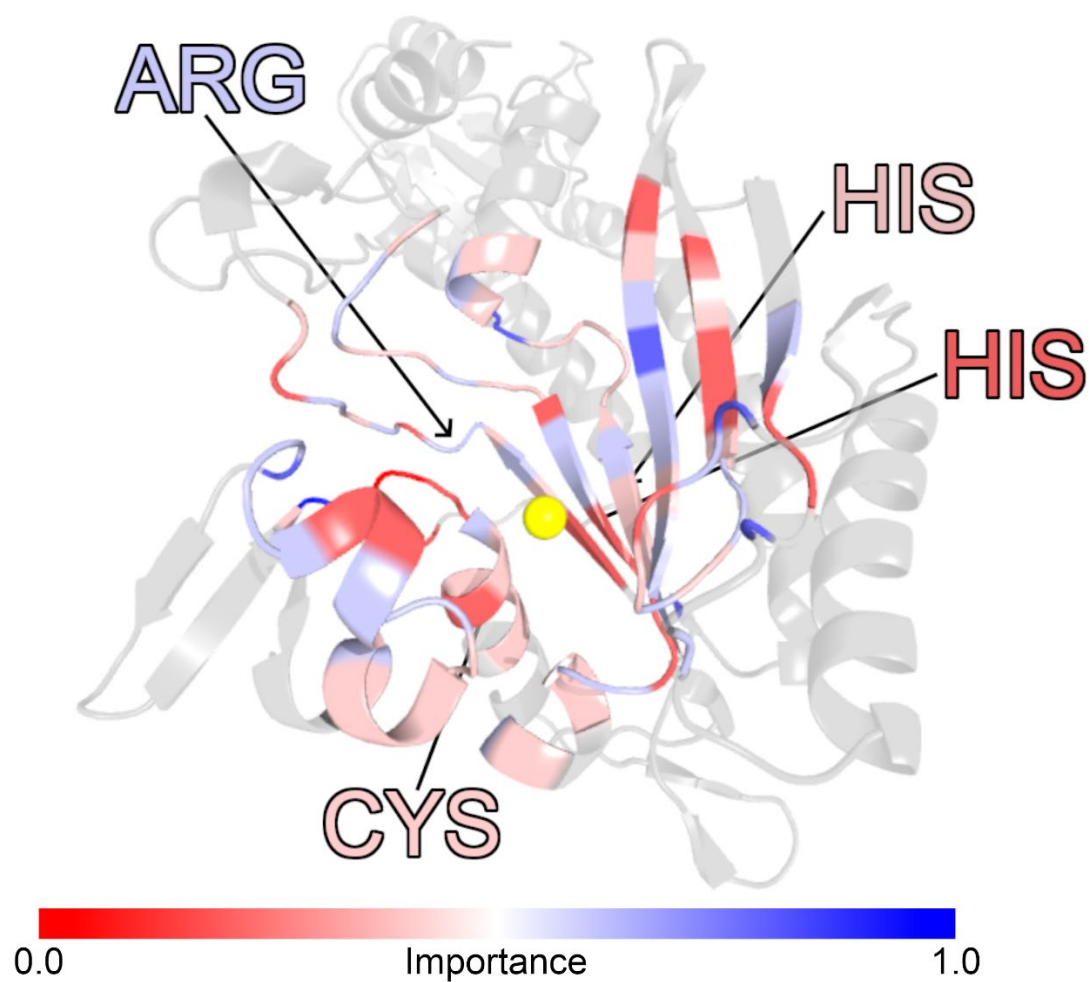

**Supplementary Figure 13.** Investigation into the importance of the catalytic sites for PDB 6VU9.

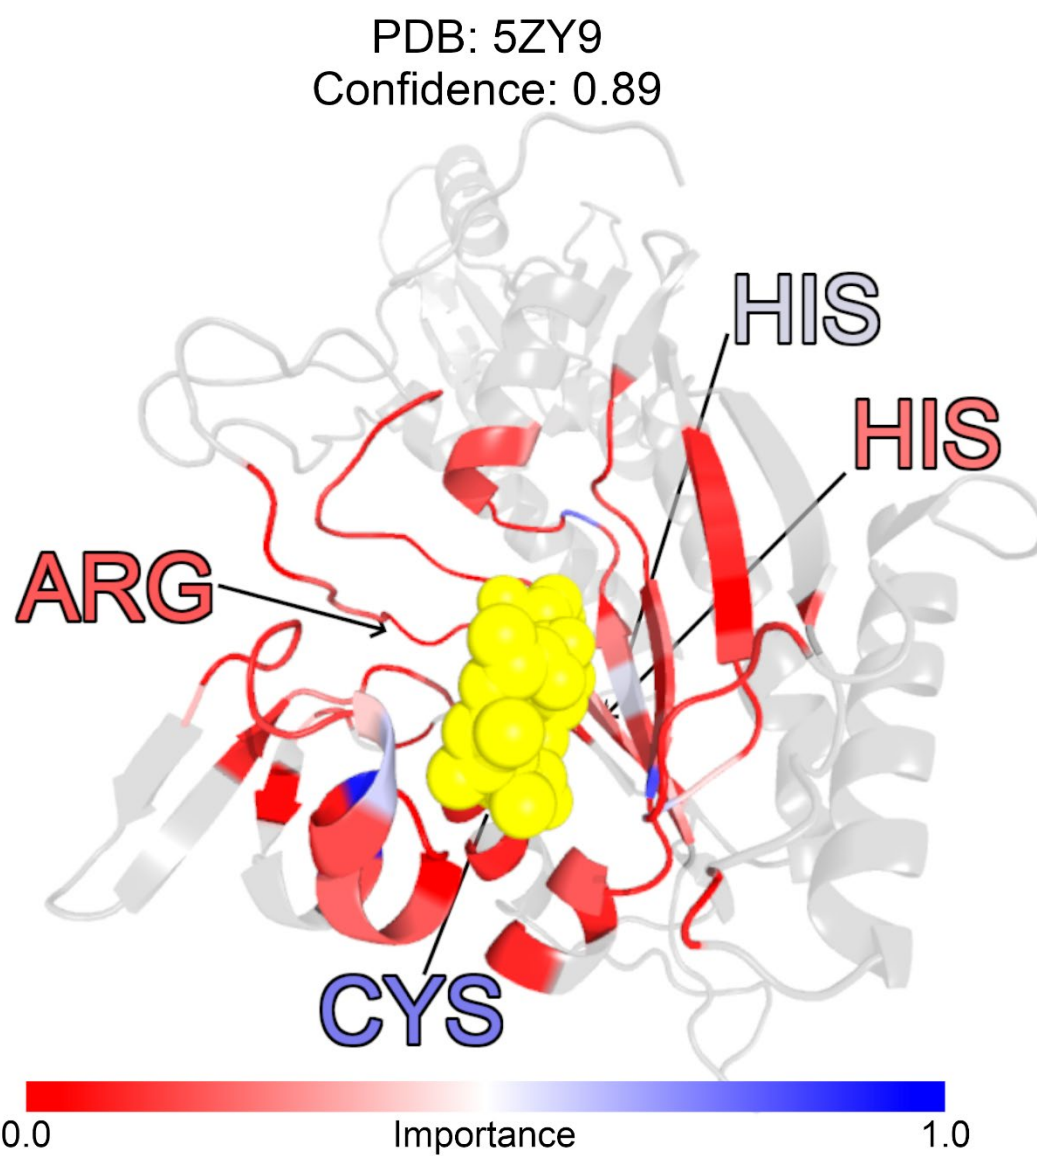

**Supplementary Figure 14.** Investigation into the importance of the catalytic sites for PDB 5ZY9.

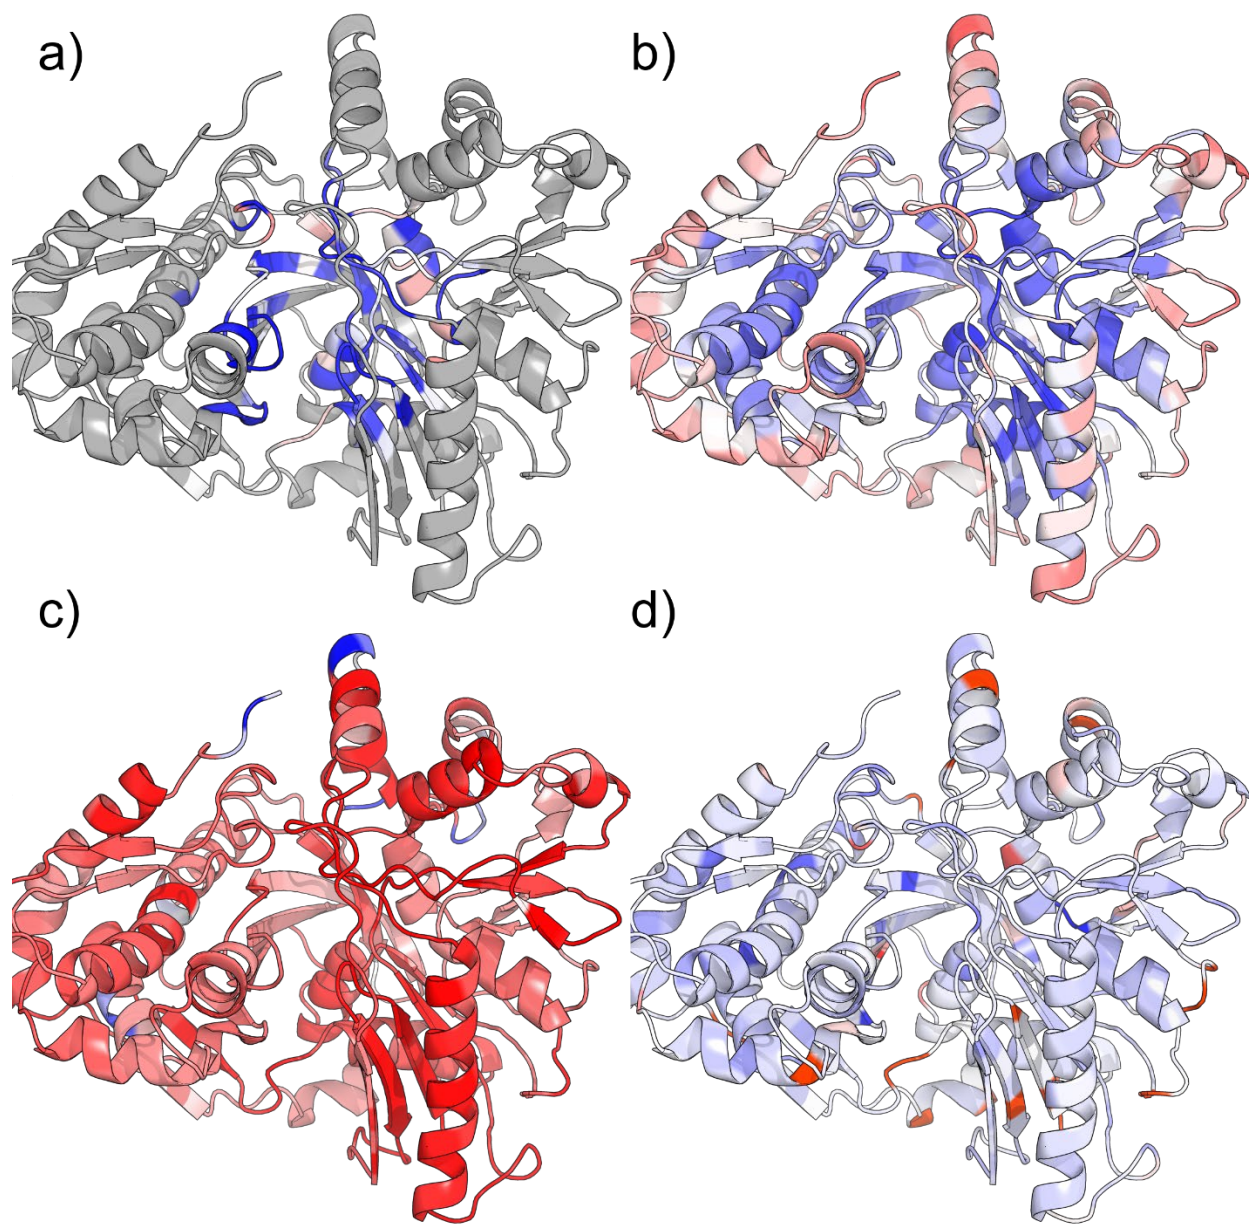

**Supplementary Figure 15.** Explained PDB structure 1GLA compared to stability predictors.

a) GNExplainer, b) Amino Acids Interaction Webserver, c) Constraint Network Analysis, d) K-Fold. For this structure, we were not able to obtain Thermometer results. Blue indicates stable, red indicates unstable residues.

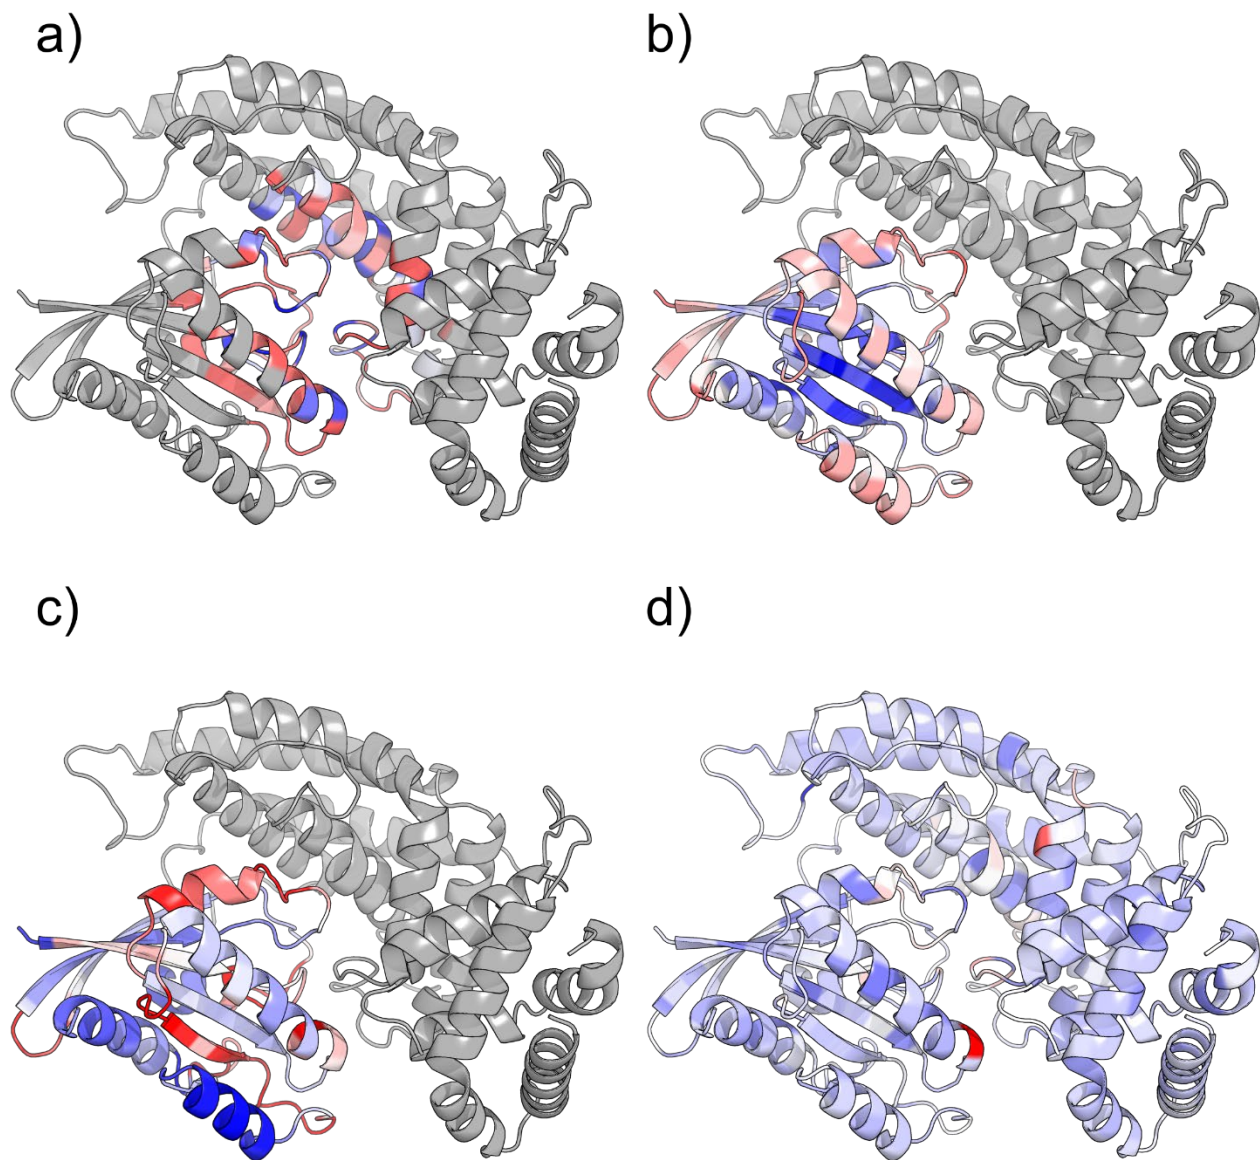

**Supplementary Figure 16.** Explained PDB structure 1WQ1 compared to stability predictors.

a) GNNExplainer, b) Amino Acids Interaction Webserver, c) Constraint Network Analysis, d) K-Fold. For this structure, we were not able to obtain Thermometer results. Blue indicates stable, red indicates unstable residues.



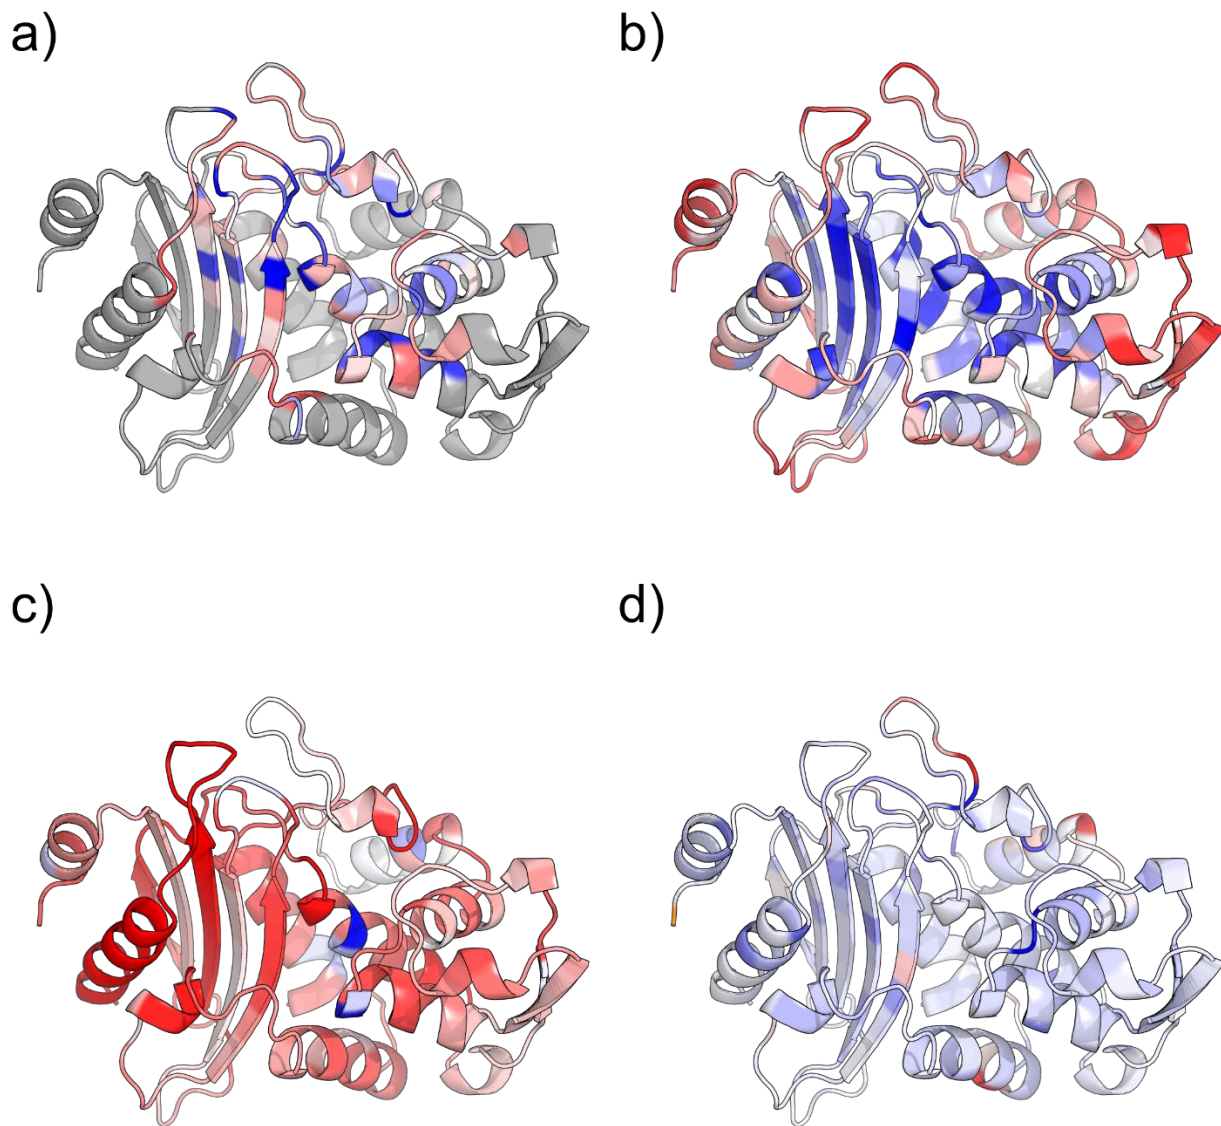

**Supplementary Figure 17.** Explained PDB structure 3BLM compared to stability predictors.

a) GNNExplainer, b) Amino Acids Interaction Webserver, c) Constraint Network Analysis, d) K-Fold. For this structure, we were not able to obtain Thermometer results. Blue indicates stable, red indicates unstable residues.

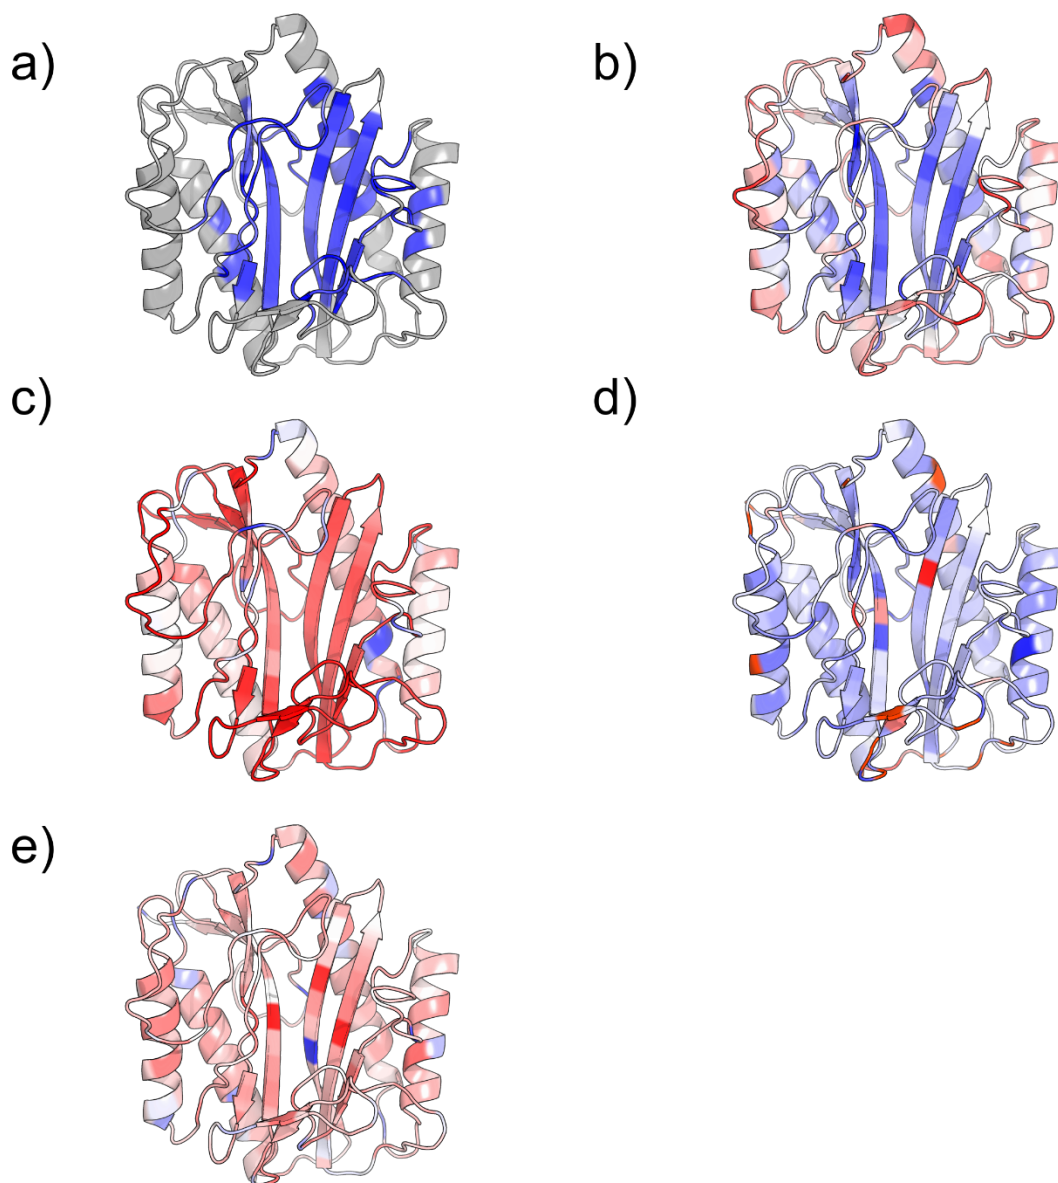

**Supplementary Figure 18.** Explained PDB structure 2MAT compared to stability.

a) GNNExplainer, b) Amino Acids Interaction Webserver, c) Constraint Network Analysis, d) K-Fold, and e) Thermometer. Blue indicates stable, red indicates unstable residues.

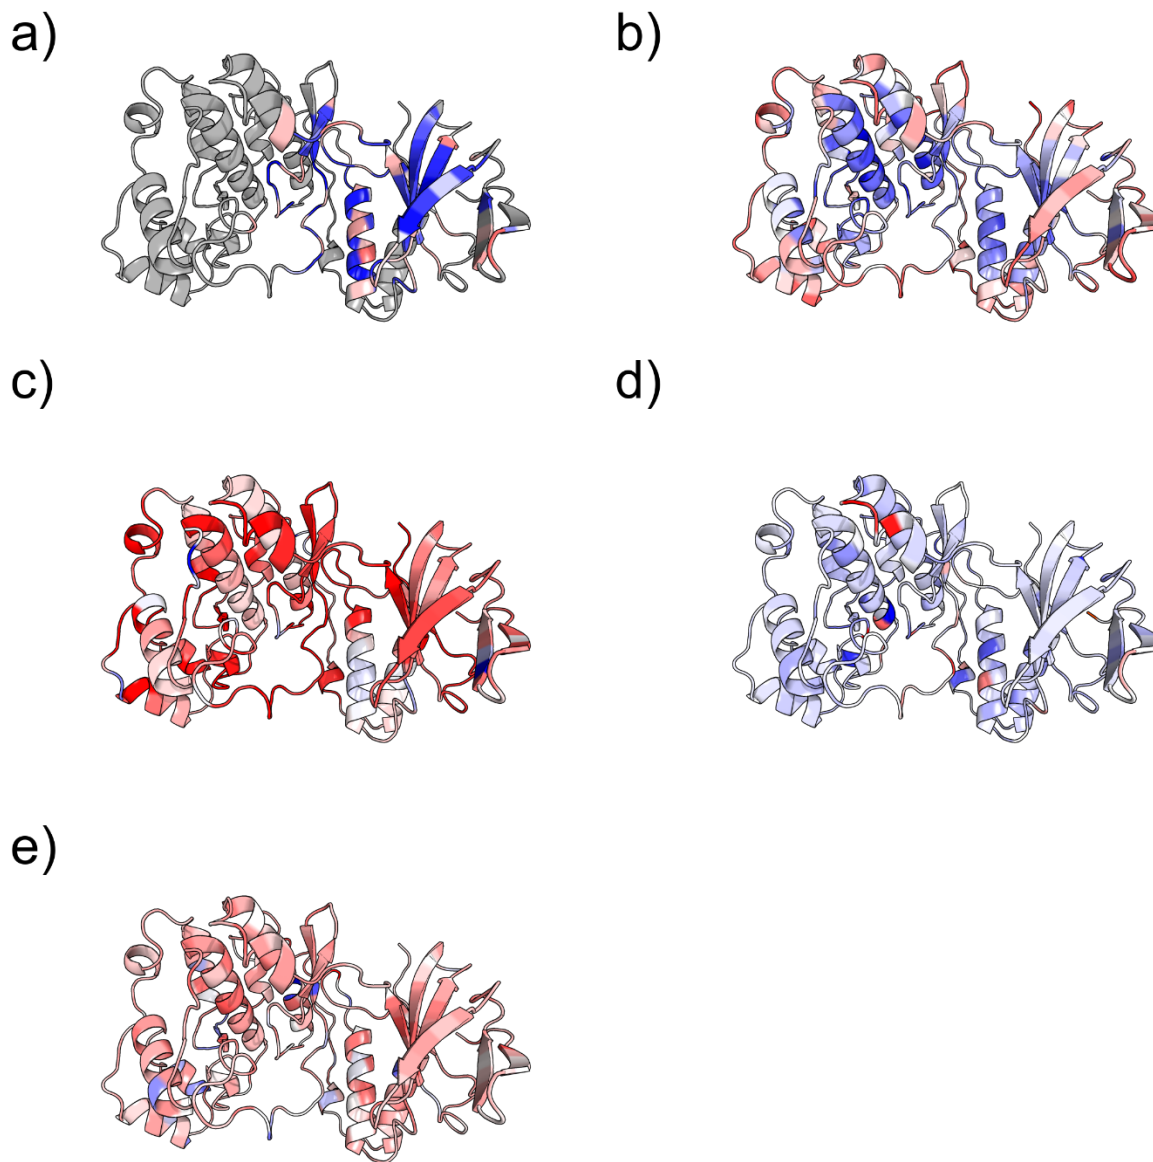

**Supplementary Figure 19.** Explained PDB structure 1A9U compared to stability predictors.

a) GNNExplainer, b) Amino Acids Interaction Webserver, c) Constraint Network Analysis, d) K-Fold, and e) Thermometer. Blue indicates stable, red indicates unstable residues.

a)

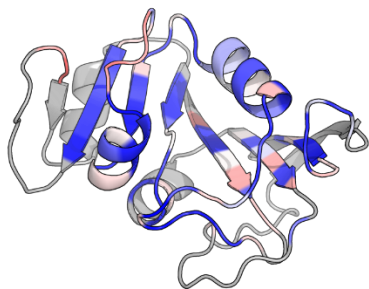

b)

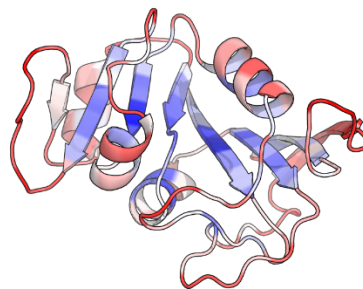

c)

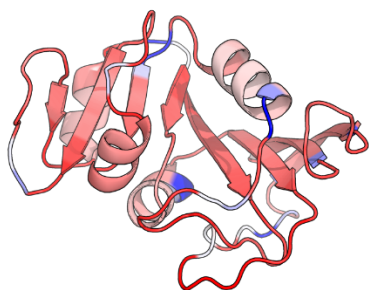

d)

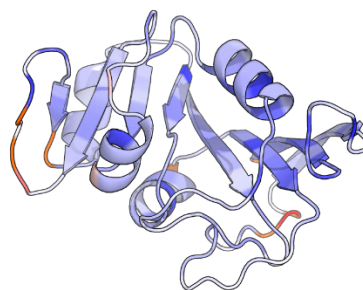

e)

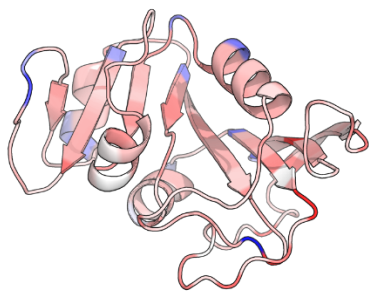

**Supplementary Figure 20.** Explained PDB structure 3DRC compared to stability predictors.

a) GNNExplainer, b) Amino Acids Interaction Webserver, c) Constraint Network Analysis, d) K-Fold, and e) Thermometer. Blue indicates stable, red indicates unstable residues.



a)

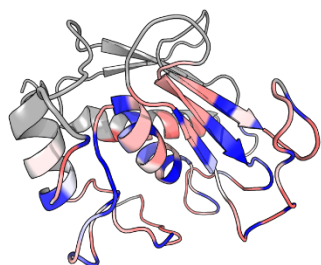

b)

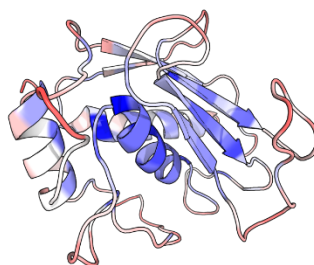

c)

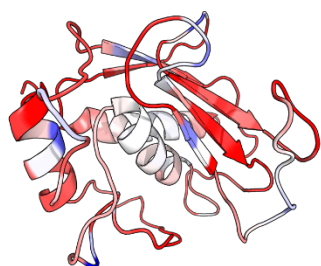

d)

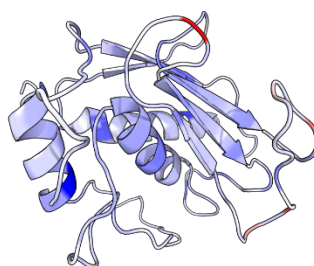

e)

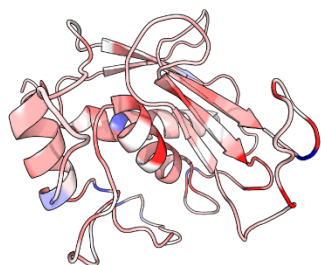

**Supplementary Figure 21.** Explained PDB structure 1BIW compared to stability predictors.

a) GNNExplainer, b) Amino Acids Interaction Webserver, c) Constraint Network Analysis, d) K-Fold, and e) Thermometer. Blue indicates stable, red indicates unstable residues.

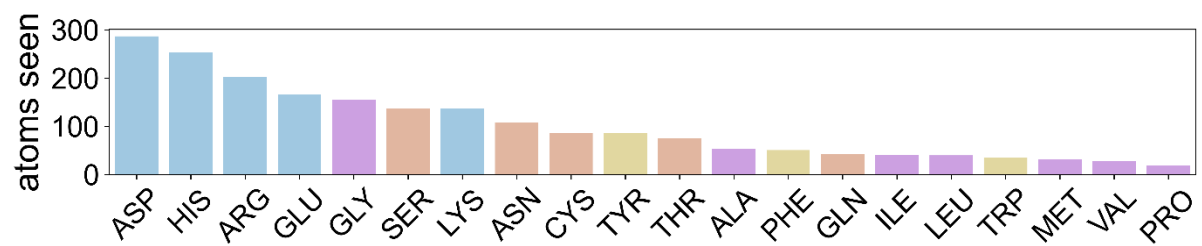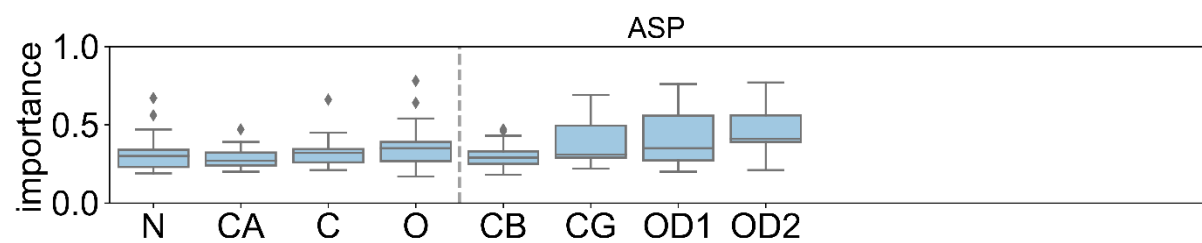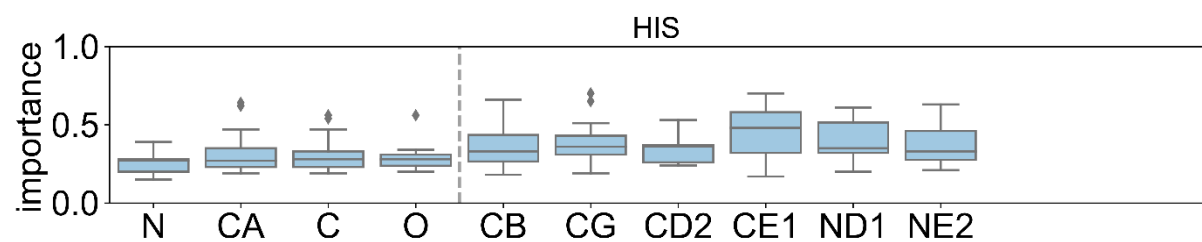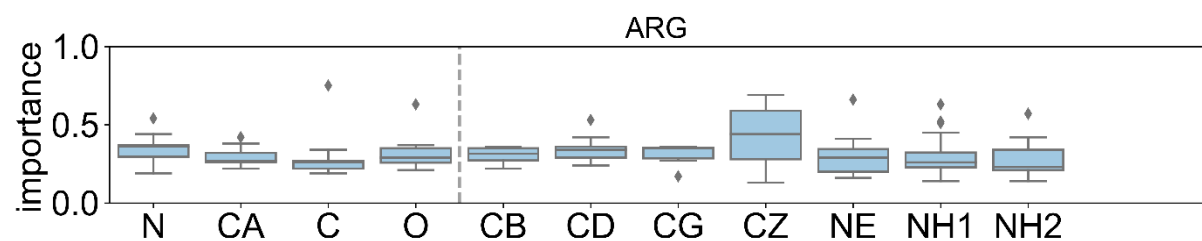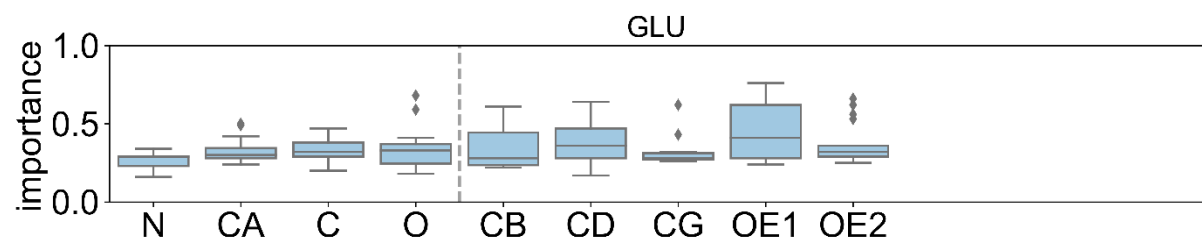

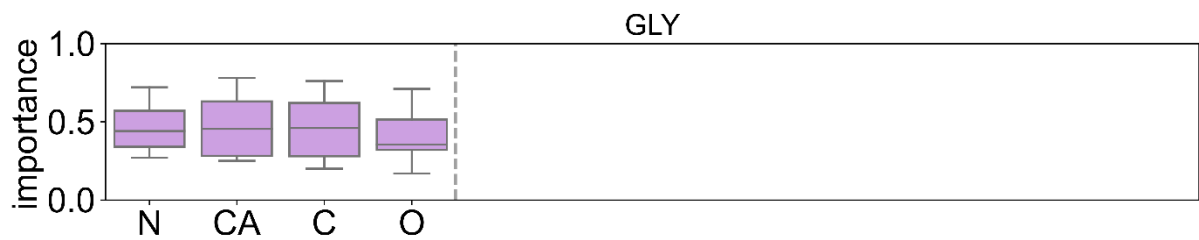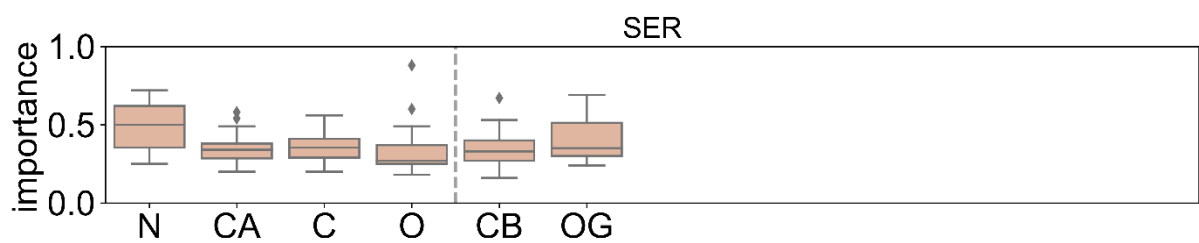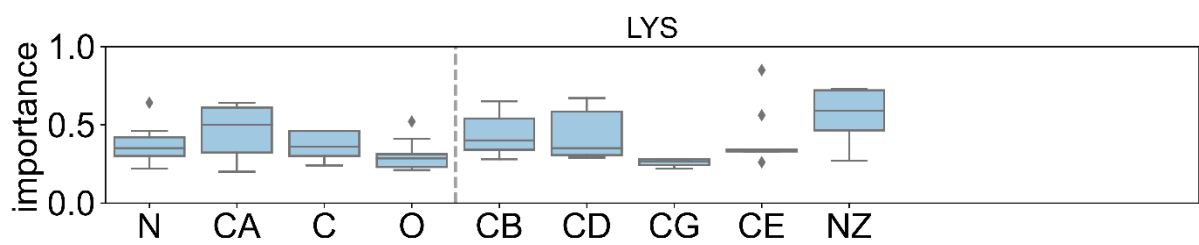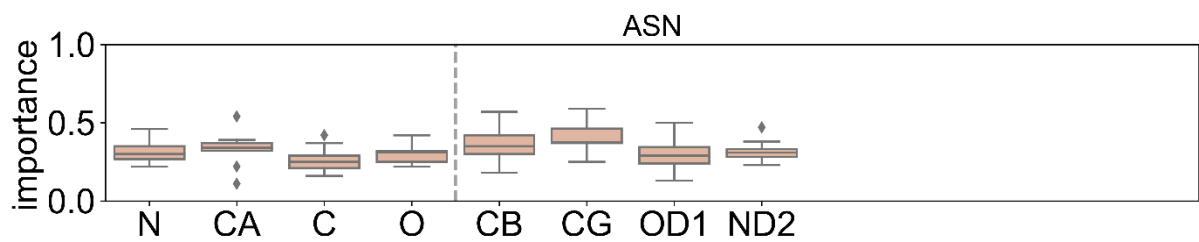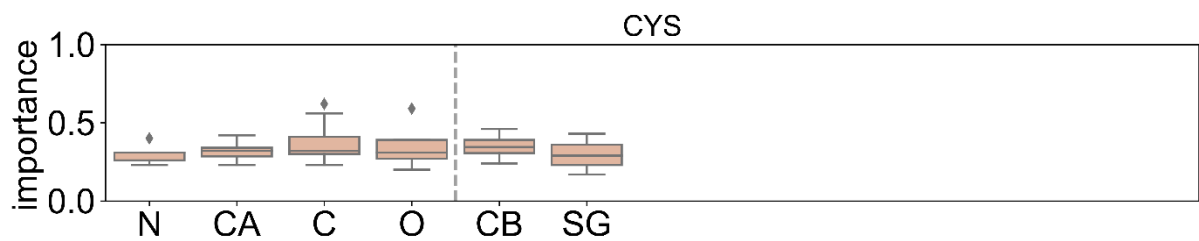

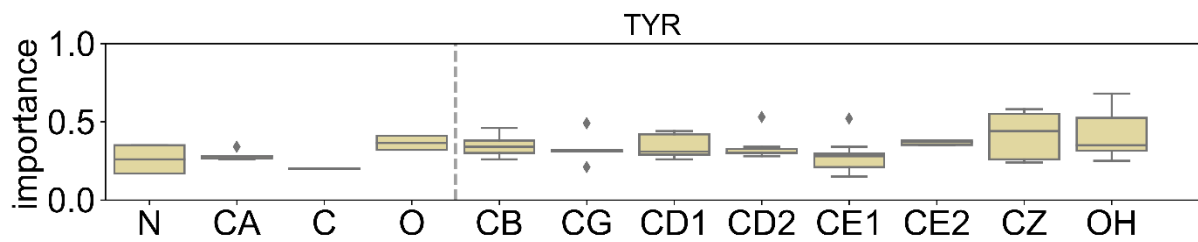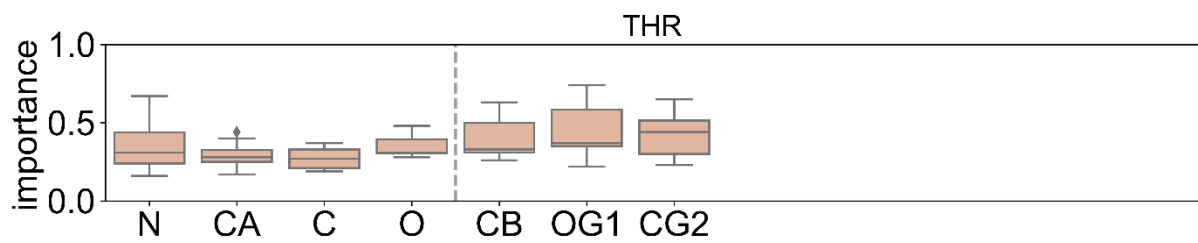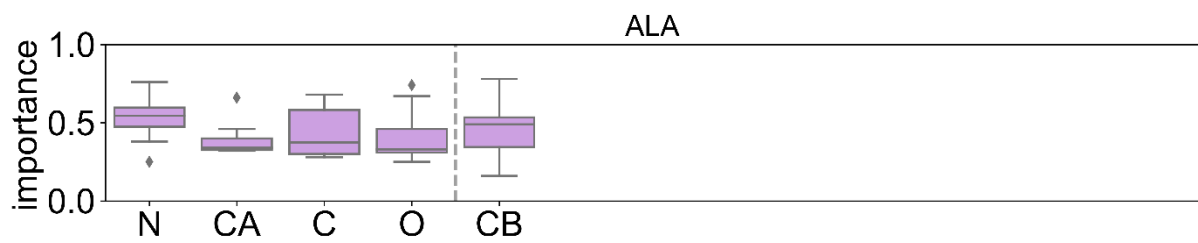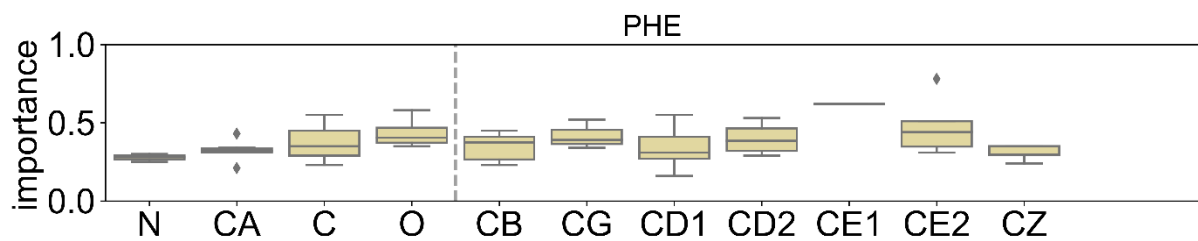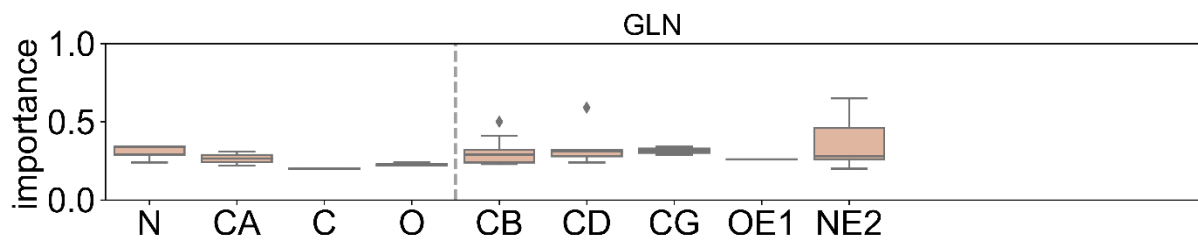

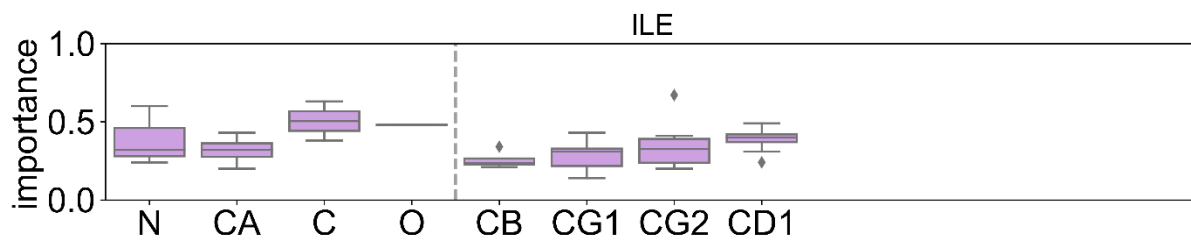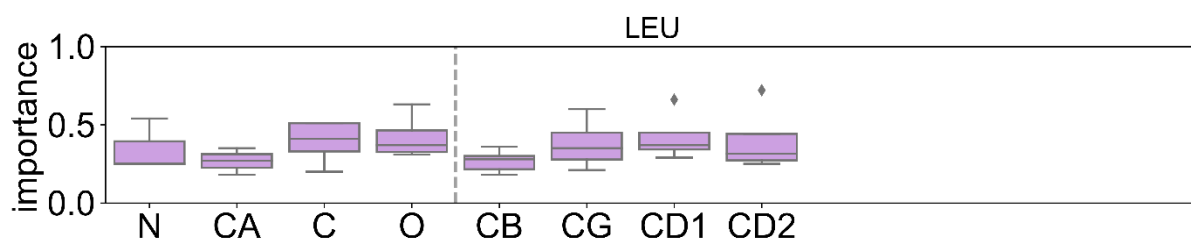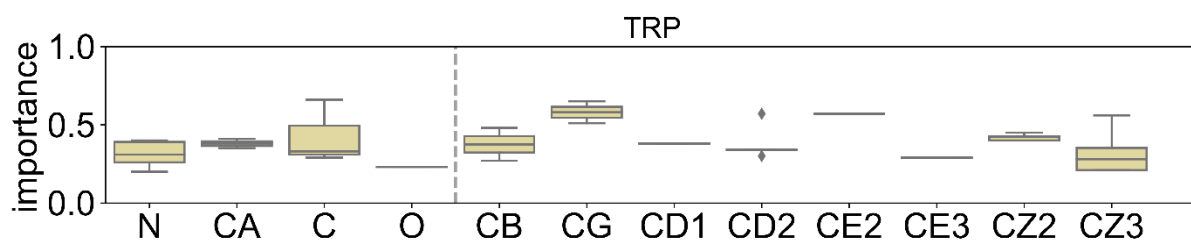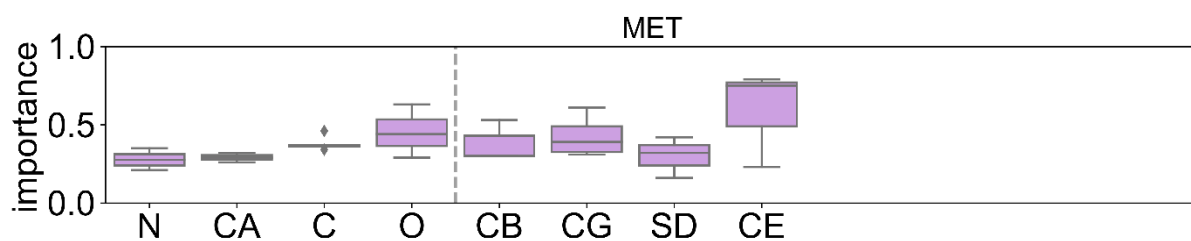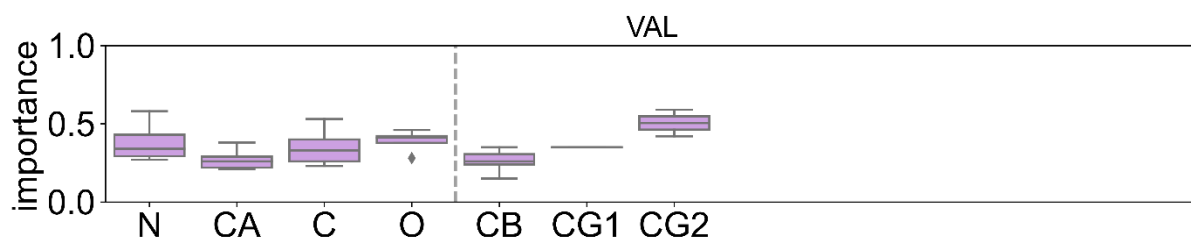

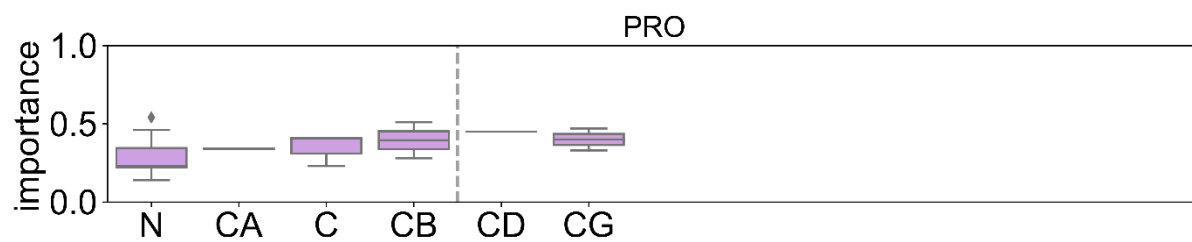

**Supplementary Figure 22.** Importance for all catalytic and binding atoms.

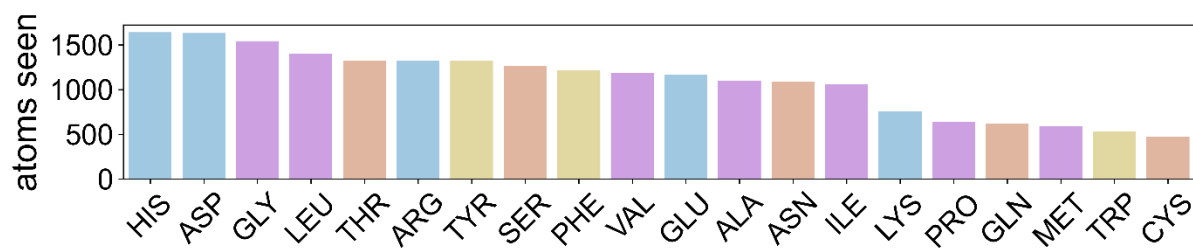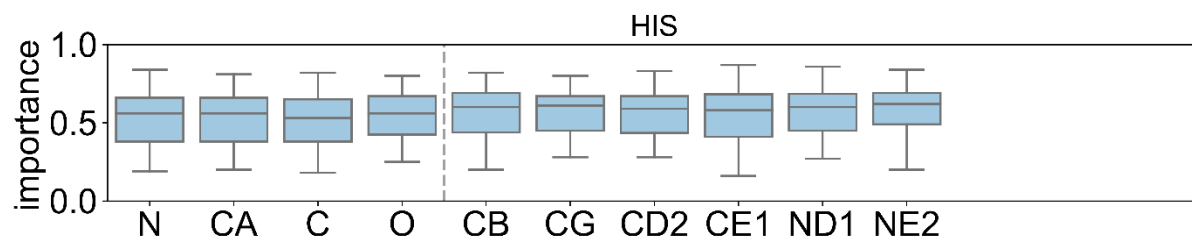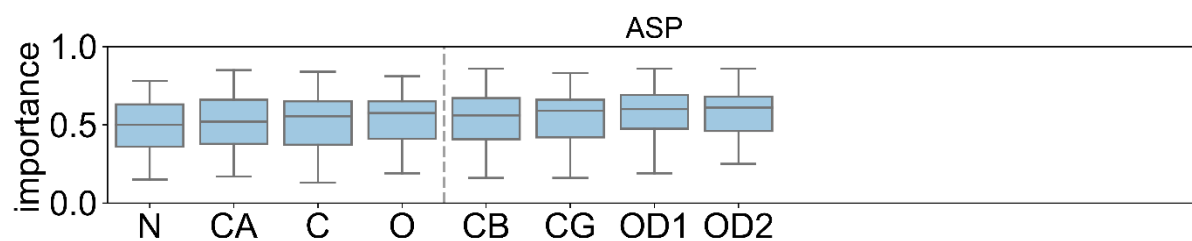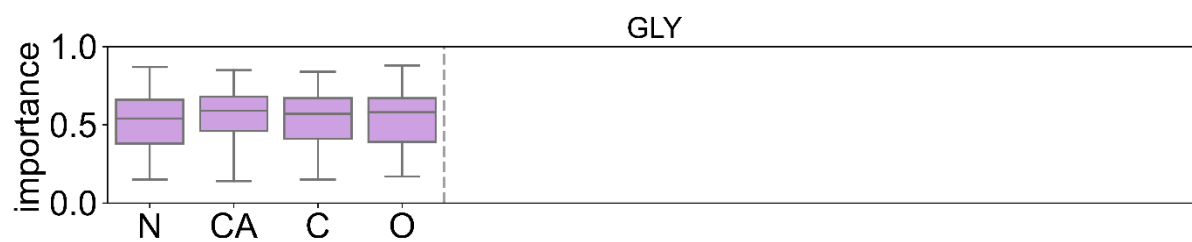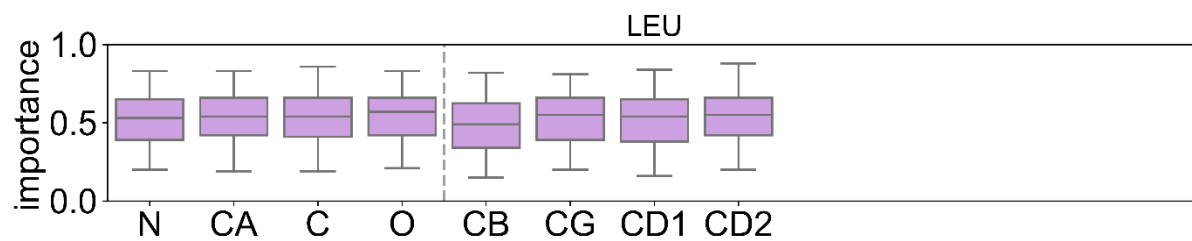

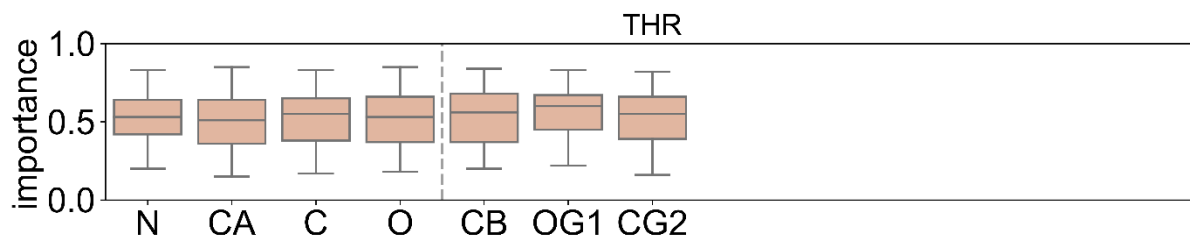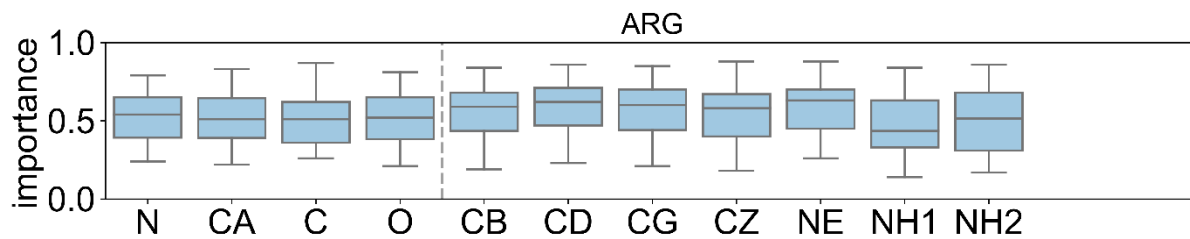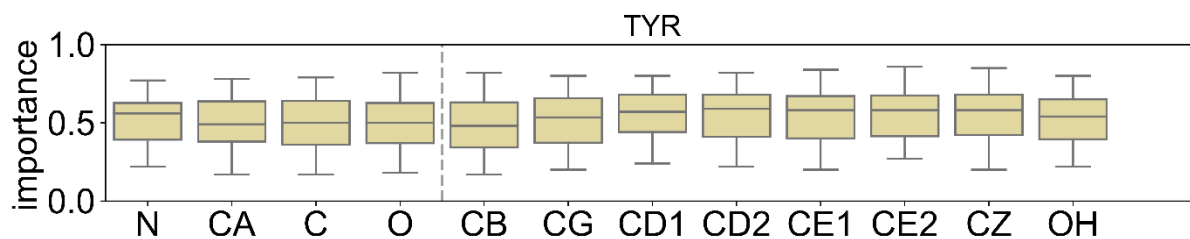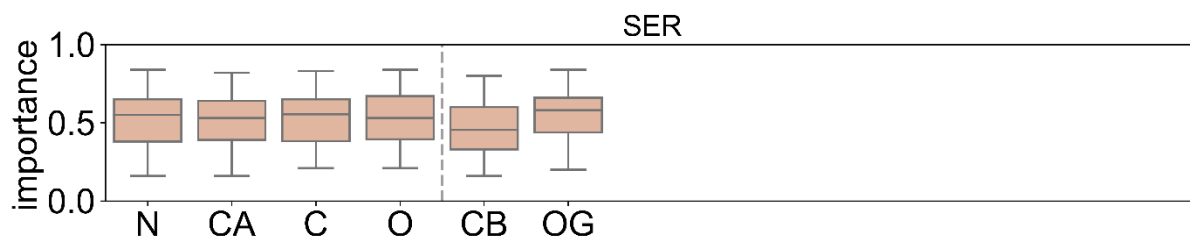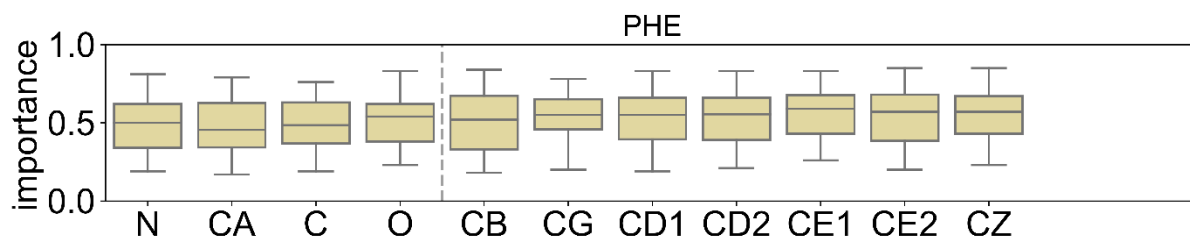



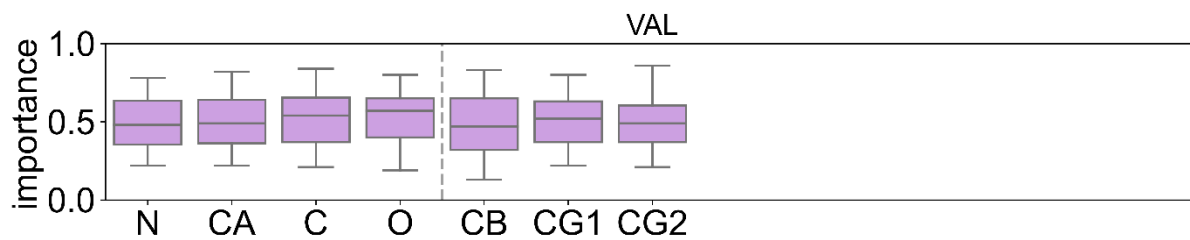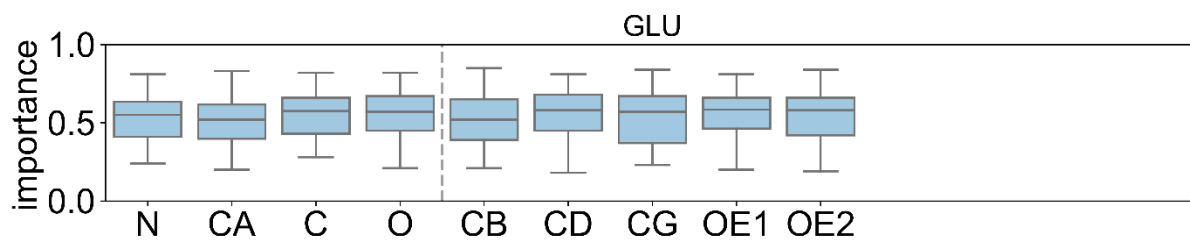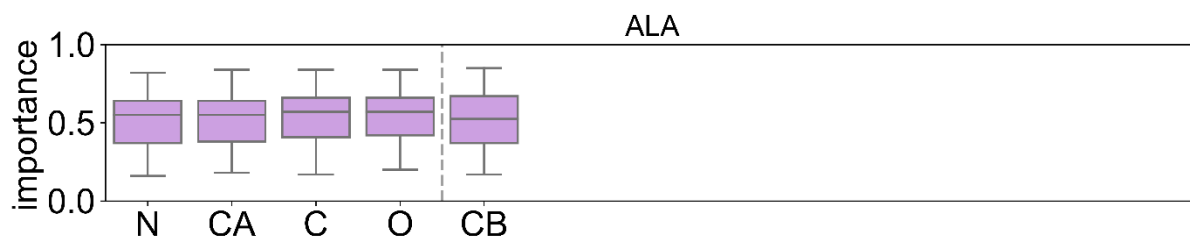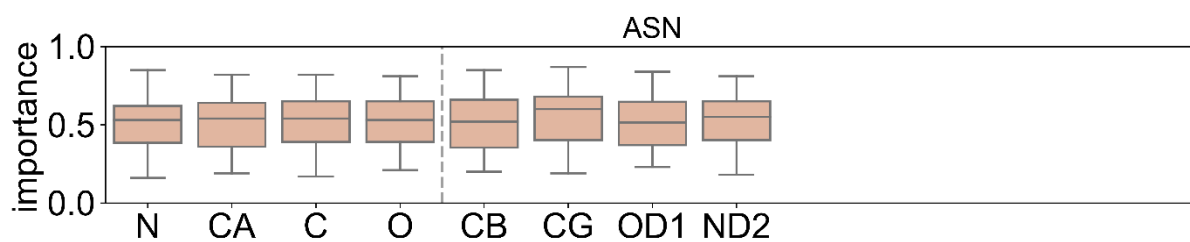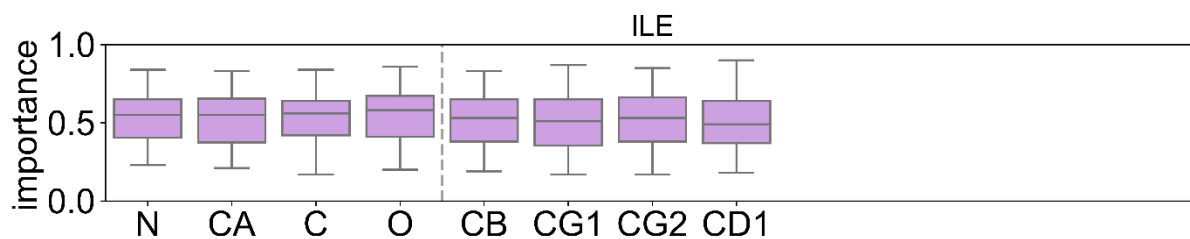

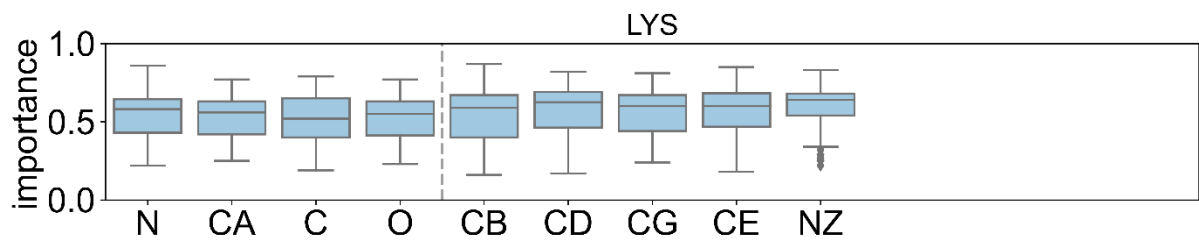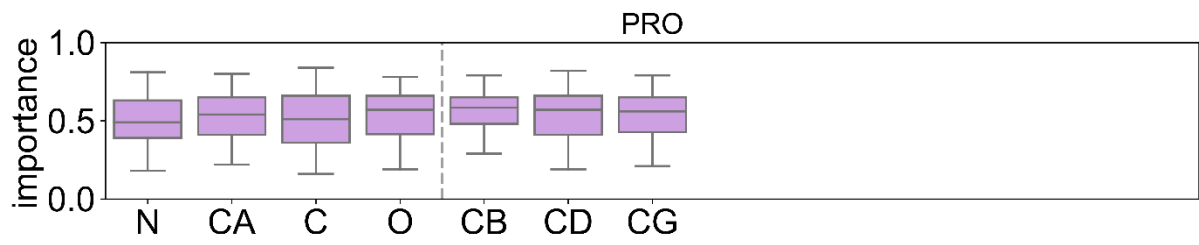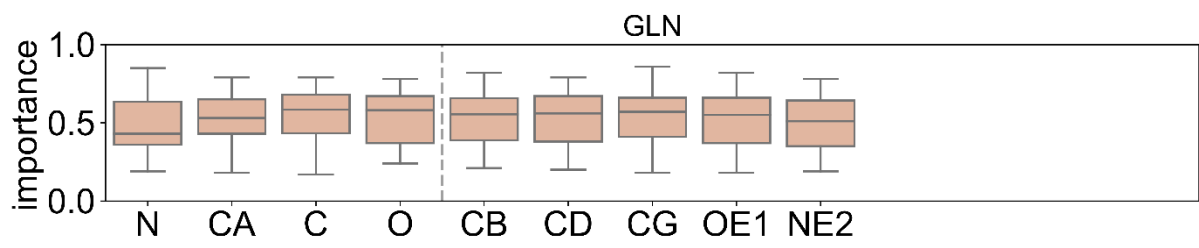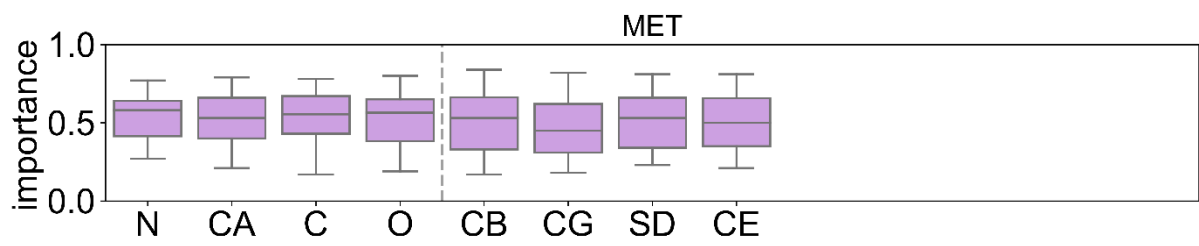

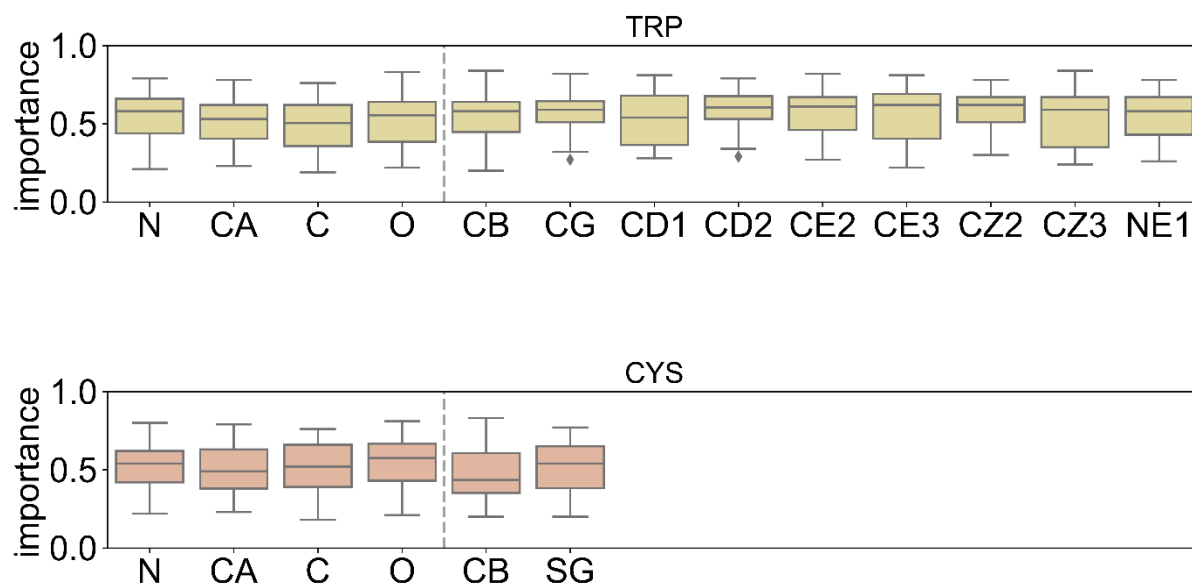

**Supplementary Figure 23.** Importance for all non-catalytic and non-binding atoms.

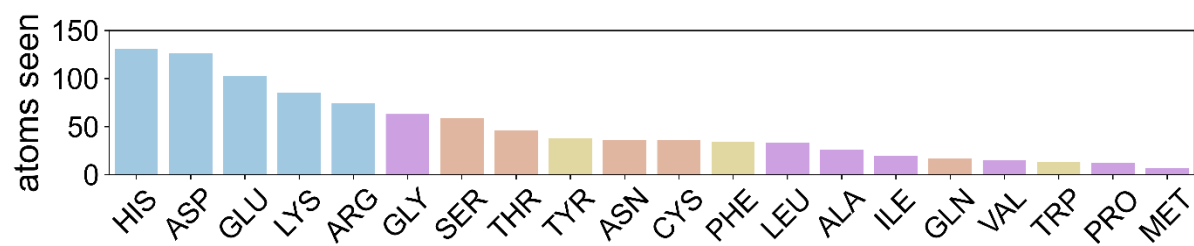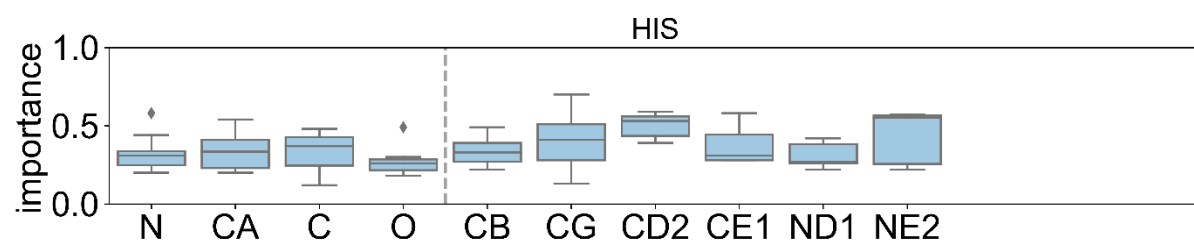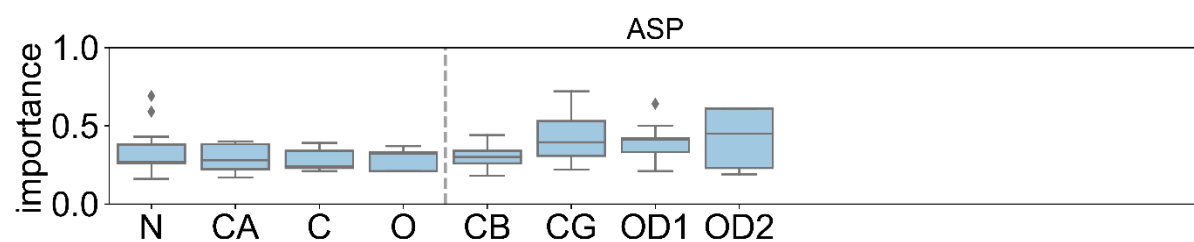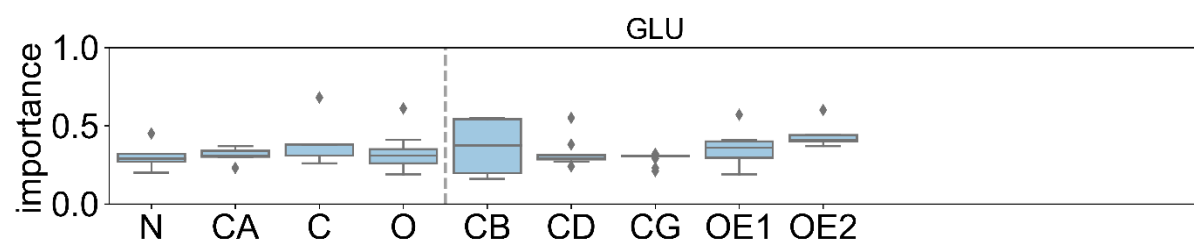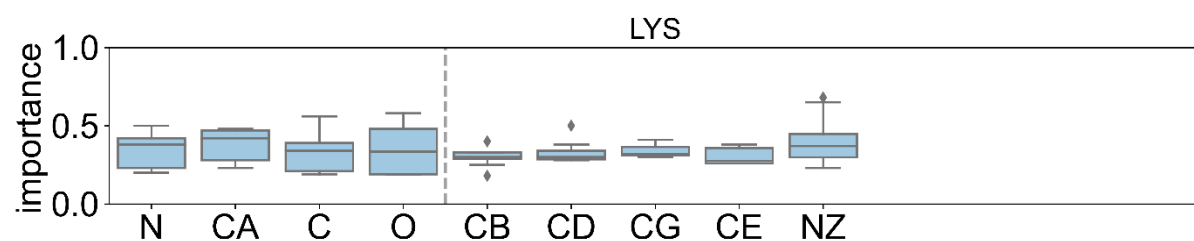

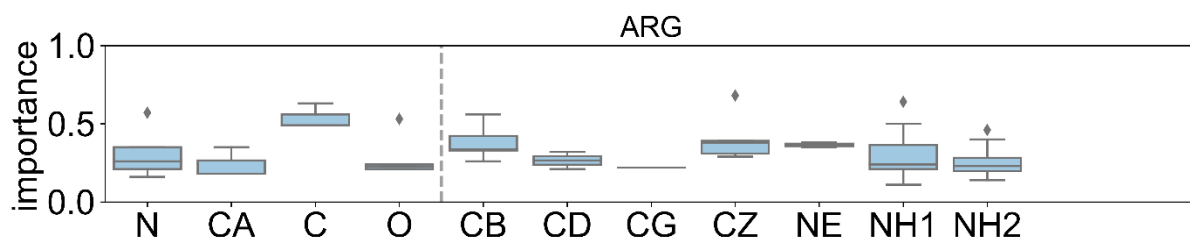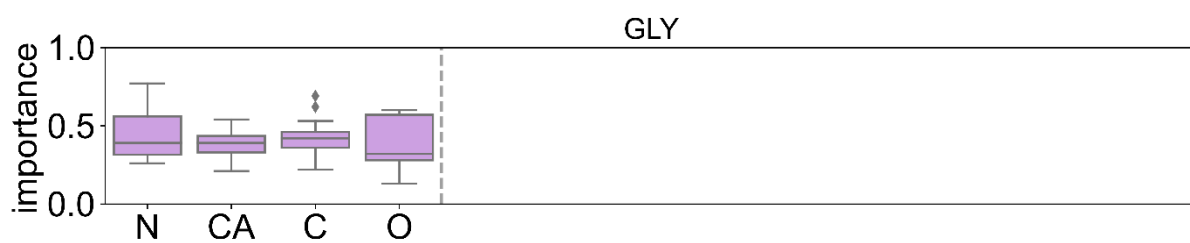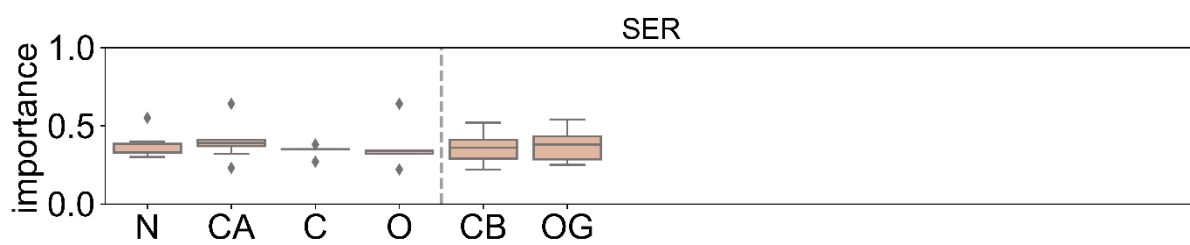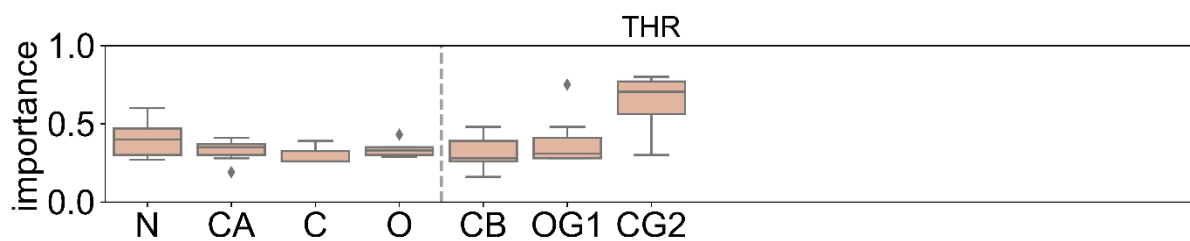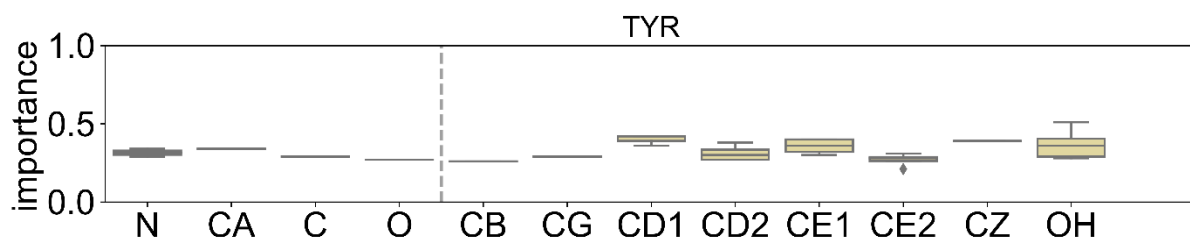

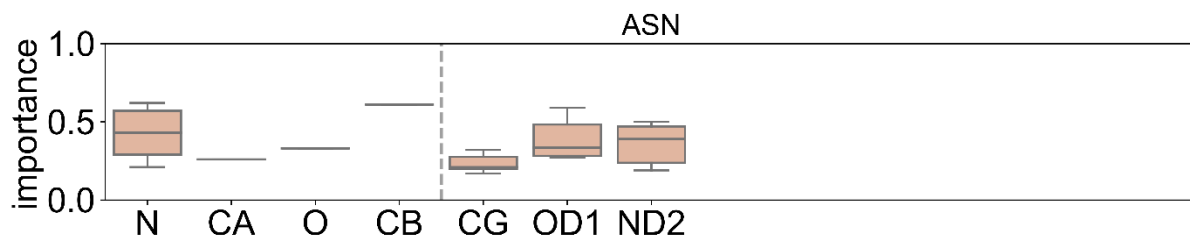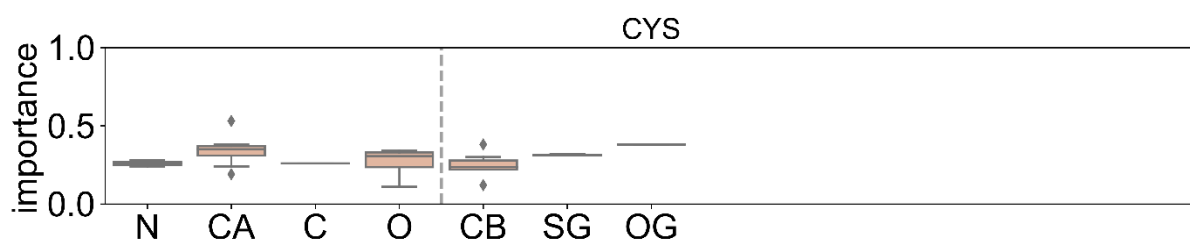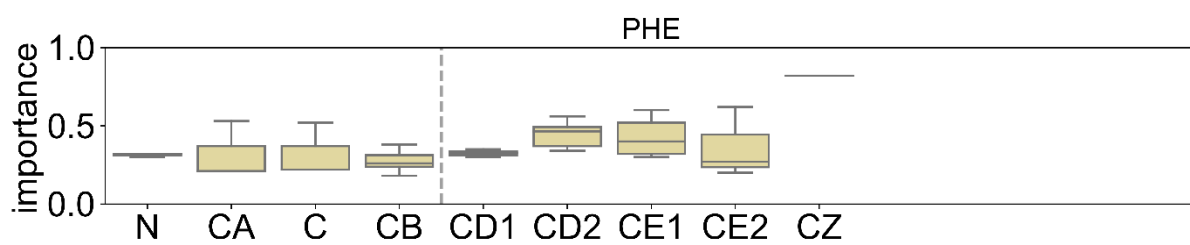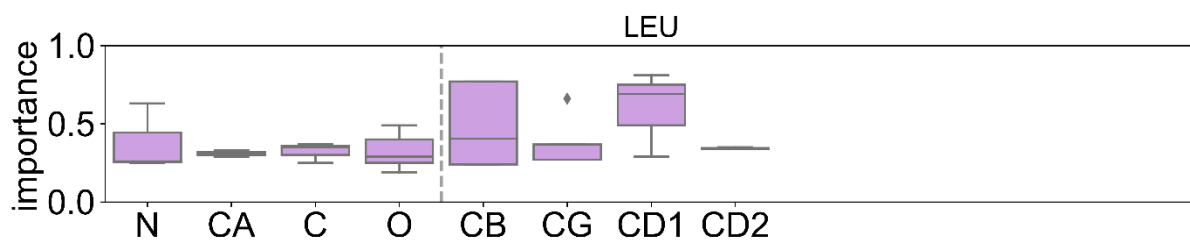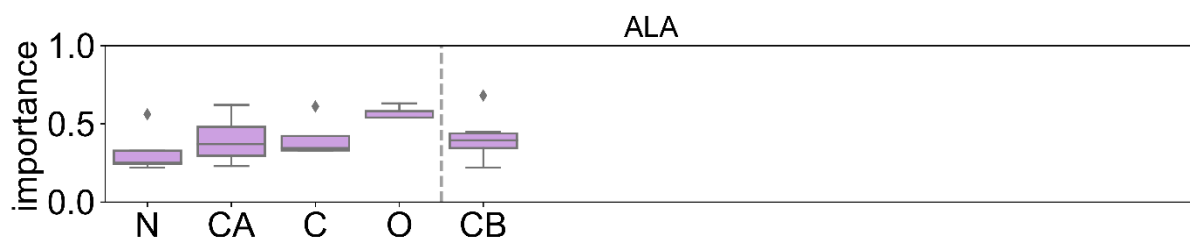

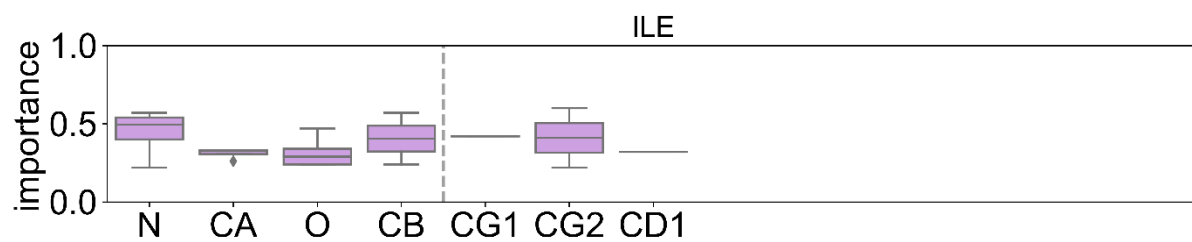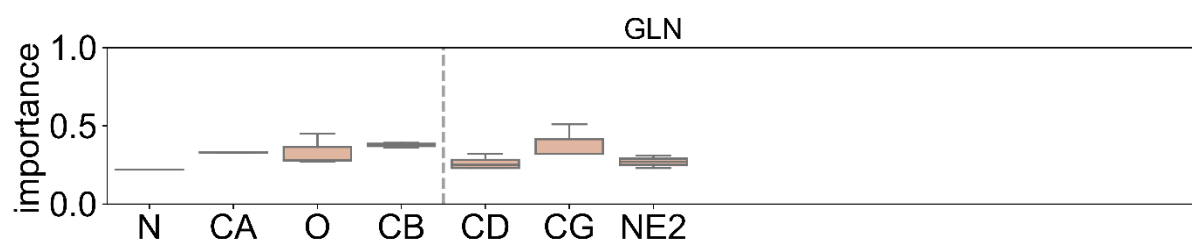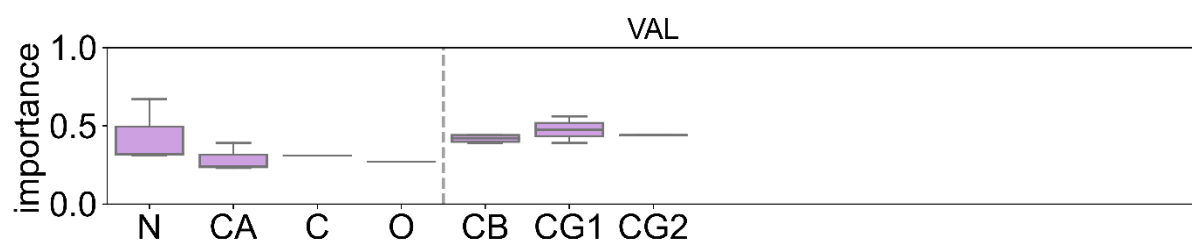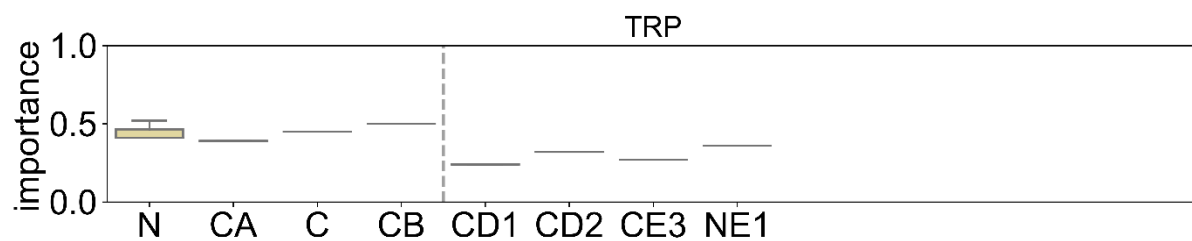

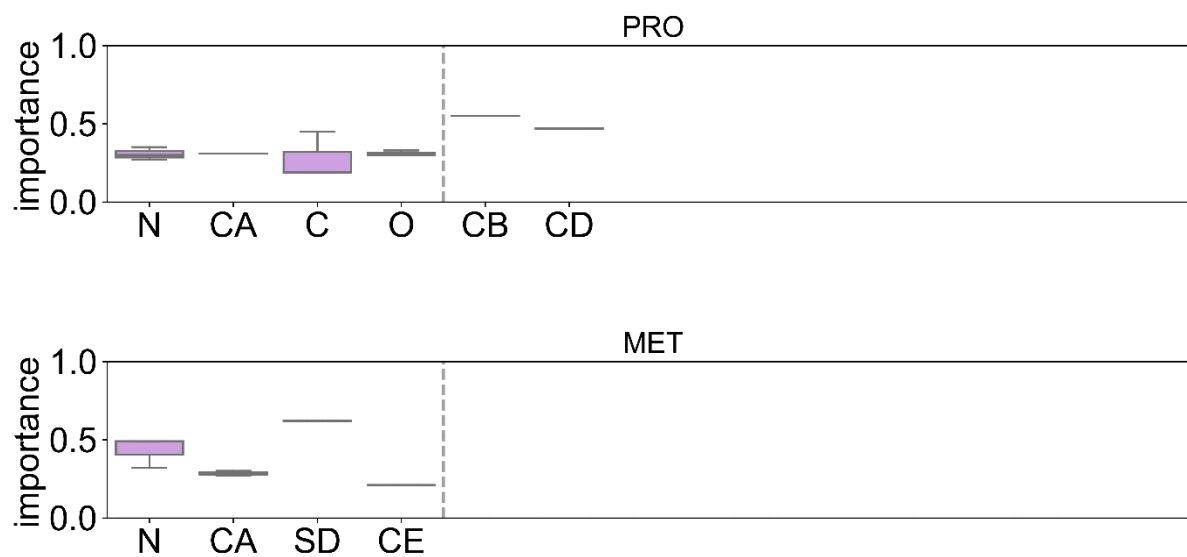

**Supplementary Figure 24.** Importance for all catalytic and binding atoms in wrongly predicted enzymes.
